# Supplementary material
Source: PubMed Central journal article supplement (PMC2214747)
Supplement: blood_blood-2007-08-107946_1.pdf [file blood_blood-2007-08-107946_1.pdf]

Wake Forest University School of Medicine, Winston-Salem, NC: David D. Hurd, Wendy L. Flejter and Mark J. Pettenati (grant no. CA03927); The Ohio State University Medical Center, Columbus, OH: Clara D. Bloomfield, Karl S. Theil and Nyla A. Heerema (grant no. CA77658); North Shore–Long Island Jewish Health System, Manhasset, NY: Daniel R. Budman and Prasad R. K. Koduru (grant no. CA35279); Roswell Park Cancer Institute, Buffalo, NY: Ellis G. Levine and AnneMarie W. Block (grant no. CA02599); Washington University School of Medicine, St. Louis, MO: Nancy L. Bartlett, Michael S. Watson and Jaime Garcia-Heras (grant no. CA77440); Dartmouth Medical School, Lebanon, NH: Marc S. Ernstoff and Thuluvancheri K. Mohandas (grant no. CA04326); University of Massachusetts Medical Center, Worcester, MA: William W. Walsh, Vikram Jaswaney, Kathleen Richkind, Michael J. Mitchell and Patricia Miron (grant no. CA37135); Dana Farber Cancer Institute, Boston, MA: Eric P. Winer, Ramana Tantravahi, Paola Dal Cin and Cynthia C. Morton (grant no. CA32291); Vermont Cancer Center, Burlington, VT: Hyman B. Muss, Elizabeth F. Allen and Mary Tang (grant no. CA77406); University of California at San Diego: Barbara A. Parker, Renée Bernstein and Marie L. Dell'Aquila (grant no. CA11789); University of North Carolina, Chapel Hill, NC: Thomas Shea and Kathleen W. Rao (grant no. CA47559); Eastern Maine Medical Center, Bangor, ME: Harvey M. Segal and Laurent J. Beauregard (grant no. CA35406); University of Iowa Hospitals, Iowa City, IA: Gerald H. Clamon and Shivanand R. Patil (grant no. CA47642); Christiana Care Health Services, Inc., Newark, DE: Stephen S. Grubbs and Jeanne M. Meck (grant no. CA45418); University of Puerto Rico School of Medicine, San Juan, PR: Eileen I. Pacheco, Cynthia C. Morton, Paola Dal Cin and Leonard L. Atkins; University of Chicago Medical Center, Chicago, IL: Gini Fleming, Diane Roulston, Yanming Zhang and Michelle M. Le Beau (grant no. CA41287); Weill Medical College of Cornell University, New York, NY: John Leonard, Prasad R. K. Koduru, and Susan Mathew (grant no. CA07968); Ft. Wayne Medical Oncology/Hematology, Ft. Wayne, IN:

Sreenivasa Nattam and Patricia I. Bader; Rhode Island Hospital, Providence, RI: William Sikov, Shelly L. Kerman and Aurelia Meloni-Ehrig (grant no. CA08025); University of Missouri/Ellis Fischel Cancer Center, Columbia, MO: Michael C. Perry and Tim H. Huang (grant no. CA12046); Mount Sinai School of Medicine, New York, NY: Lewis R. Silverman and Vesna Najfeld (grant no. CA04457); Massachusetts General Hospital, Boston, MA: Jeffrey W. Clark, Paola Dal Cin and Cynthia C. Morton (grant no. CA 12449); Georgetown University Medical Center, Washington, DC: Minnetta C. Liu and Jeanne M. Meck (grant no. CA77597); Duke University Medical Center, Durham, NC: Jeffrey Crawford and Mazin B. Qumsiyeh (grant no. CA47577); Southern Nevada Cancer Research Foundation CCOP, Las Vegas, NV: John Ellerton (grant no. CA35421); Virginia Commonwealth University MB CCOP, Richmond, VA: John D. Roberts and Colleen Jackson-Cook (grant no. CA52784); SUNY Upstate Medical University, Syracuse, NY: Stephen L. Graziano and Constance K. Stein (grant no. CA21060); Minneapolis VA Medical Center, Minneapolis, MN: Vicki A. Morrison and Sugandhi A. Tharapel (grant no. CA47555); University of Minnesota, Minneapolis, MN: Bruce A. Peterson and Betsy A. Hirsch (grant no. CA16450); University of Illinois at Chicago: David J. Peace and Maureen M. McCorquodale (grant no. CA74811); Walter Reed Army Medical Center, Washington, DC: Thomas Reid and Digamber S. Borgaonkar (grant no. CA26806).
