# Supplementary material
Source: PubMed Central journal article supplement (PMC2214747)
Supplement: blood_blood-2007-08-107946_2.pdf [file blood_blood-2007-08-107946_2.pdf]

| Probe set    | Description                                                                                                                        | Gene symbol                          | Fold-change:<br>TKD/WT | P-value   |
|--------------|------------------------------------------------------------------------------------------------------------------------------------|--------------------------------------|------------------------|-----------|
| 205844_at    | vanin 1                                                                                                                            | <i>VNN1</i>                          | 8.73                   | < 1e-07   |
| 219434_at    | triggering receptor expressed on myeloid cells 1                                                                                   | <i>TREM1</i>                         | 4.87                   | 0.0005145 |
| 228083_at    | calcium channel, voltage-dependent, alpha 2/delta subunit 4                                                                        | <i>CACNA2D4</i>                      | 4.64                   | 3.22E-05  |
| 205366_s_at  | homeobox B6                                                                                                                        | <i>HOXB6</i>                         | 4.34                   | 0.000659  |
| 211776_s_at  | erythrocyte membrane protein band 4.1-like 3                                                                                       | <i>EPB41L3</i>                       | 3.76                   | 0.0007795 |
| 205922_at    | vanin 2                                                                                                                            | <i>VNN2</i>                          | 3.67                   | 0.0002261 |
| 1558549_s_at | vanin 1                                                                                                                            | <i>VNN1</i>                          | 3.64                   | < 1e-07   |
| 209906_at    | complement component 3a receptor 1                                                                                                 | <i>C3AR1</i>                         | 3.62                   | 9.80E-06  |
| 1552690_a_at | calcium channel, voltage-dependent, alpha 2/delta subunit 4                                                                        | <i>CACNA2D4</i>                      | 3.58                   | 1.32E-05  |
| 209446_s_at  | chromosome 7 open reading frame 44                                                                                                 | <i>C7orf44</i>                       | 3.44                   | 0.0006603 |
| 205180_s_at  | ADAM metalloproteinase domain 8                                                                                                    | <i>ADAM8</i>                         | 3.13                   | 1.62E-05  |
| 212681_at    | erythrocyte membrane protein band 4.1-like 3                                                                                       | <i>EPB41L3</i>                       | 3.11                   | 0.0005601 |
| 225372_at    | chromosome 10 open reading frame 54                                                                                                | <i>C10orf54</i>                      | 3.05                   | 0.0005507 |
| 204774_at    | ecotropic viral integration site 2A                                                                                                | <i>EVI2A</i>                         | 3.02                   | 0.0003385 |
| 212335_at    | glucosamine (N-acetyl)-6-sulfatase (Sanfilippo disease IIID)                                                                       | <i>GNS</i>                           | 2.97                   | 0.0005325 |
| 213700_s_at  | Pyruvate kinase, muscle                                                                                                            | <i>PKM2</i>                          | 2.95                   | 0.0002389 |
| 1554503_a_at | osteoclast-associated receptor                                                                                                     | <i>OSCAR</i>                         | 2.92                   | 0.0004036 |
| 210184_at    | integrin, alpha X (complement component 3 receptor 4 subunit)                                                                      | <i>ITGAX</i>                         | 2.91                   | 0.000192  |
| 202877_s_at  | CD93 molecule                                                                                                                      | <i>CD93</i>                          | 2.87                   | 0.0006775 |
| 220507_s_at  | ureidopropionase, beta                                                                                                             | <i>UPB1</i>                          | 2.81                   | 0.0003778 |
| 210423_s_at  | solute carrier family 11 (proton-coupled divalent metal ion transporters), member 1                                                | <i>SLC11A1</i>                       | 2.71                   | 0.0009943 |
| 202856_s_at  | solute carrier family 16, member 3 (monocarboxylic acid transporter 4)                                                             | <i>SLC16A3</i>                       | 2.68                   | 0.0001484 |
| 212334_at    | glucosamine (N-acetyl)-6-sulfatase (Sanfilippo disease IIID)                                                                       | <i>GNS</i>                           | 2.68                   | 0.0002227 |
| 225373_at    | chromosome 10 open reading frame 54                                                                                                | <i>C10orf54</i>                      | 2.55                   | 0.0004141 |
| 1554175_at   | CD300 molecule-like family member b                                                                                                | <i>CD300LB</i>                       | 2.45                   | 0.0004258 |
| 244654_at    | myosin IG                                                                                                                          | <i>MYO1G</i>                         | 2.43                   | 0.0001465 |
| 1554285_at   | hepatitis A virus cellular receptor 2                                                                                              | <i>HAVCR2</i>                        | 2.40                   | 0.0009532 |
| 202855_s_at  | solute carrier family 16, member 3 (monocarboxylic acid transporter 4)                                                             | <i>SLC16A3</i>                       | 2.33                   | 0.0005781 |
| 218501_at    | Rho guanine nucleotide exchange factor (GEF) 3                                                                                     | <i>ARHGEF3</i>                       | 2.32                   | 0.0001439 |
| 205179_s_at  | ADAM metalloproteinase domain 8                                                                                                    | <i>ADAM8</i>                         | 2.32                   | 0.0001575 |
| 241464_s_at  | FLJ27365 protein                                                                                                                   | <i>FLJ27365</i>                      | 2.32                   | 0.0007656 |
| 217507_at    | solute carrier family 11 (proton-coupled divalent metal ion transporters), member 1                                                | <i>SLC11A1</i>                       | 2.32                   | 0.0005676 |
| 209933_s_at  | CD300a molecule                                                                                                                    | <i>CD300A</i>                        | 2.31                   | 0.0004433 |
| 204575_s_at  | matrix metalloproteinase 19 /// similar to Matrix metalloproteinase-19 precursor (MMP-19) (Matrix metalloproteinase RASI) (MMP-18) | <i>MMP19</i> ///<br><i>LOC652543</i> | 2.29                   | 0.0007976 |
| 206687_s_at  | protein tyrosine phosphatase, non-receptor type 6                                                                                  | <i>PTPN6</i>                         | 2.26                   | 5.92E-05  |
| 240392_at    | Caspase recruitment domain family, member 14                                                                                       | <i>CARD14</i>                        | 2.23                   | 0.0005708 |
| 204158_s_at  | T-cell, immune regulator 1, ATPase, H+ transporting, lysosomal V0 subunit A3                                                       | <i>TCIRG1</i>                        | 2.22                   | 0.0002756 |
| 217078_s_at  | CD300a molecule                                                                                                                    | <i>CD300A</i>                        | 2.18                   | 0.000213  |
| 207270_x_at  | CD300c molecule                                                                                                                    | <i>CD300C</i>                        | 2.12                   | 0.0005495 |
| 202422_s_at  | acyl-CoA synthetase long-chain family member 4                                                                                     | <i>ACSL4</i>                         | 2.11                   | 0.0001539 |
| 228762_at    | lunatic fringe homolog (Drosophila)                                                                                                | <i>LFNG</i>                          | 2.09                   | 0.0001027 |
| 200766_at    | cathepsin D (lysosomal aspartyl peptidase)                                                                                         | <i>CTSD</i>                          | 2.09                   | 0.0007615 |
| 211286_x_at  | colony stimulating factor 2 receptor, alpha, low-affinity (granulocyte-macrophage)                                                 | <i>CSF2RA</i>                        | 2.08                   | 0.0007478 |
| 207643_s_at  | tumor necrosis factor receptor superfamily, member 1A                                                                              | <i>TNFRSF1A</i>                      | 2.05                   | 0.0002626 |
| 230261_at    | ST8 alpha-N-acetylneuraminide alpha-2,8-sialyltransferase 4                                                                        | <i>ST8SIA4</i>                       | 2.05                   | 0.0009507 |

|              |                                                                                             |                  |      |           |
|--------------|---------------------------------------------------------------------------------------------|------------------|------|-----------|
| 230462_at    | numb homolog (Drosophila)                                                                   | <i>NUMB</i>      | 2.04 | 0.000566  |
| 205774_at    | coagulation factor XII (Hageman factor)                                                     | <i>F12</i>       | 2.03 | 8.66E-05  |
| 1555116_s_at | solute carrier family 11 (proton-coupled divalent metal ion transporters), member 1         | <i>SLC11A1</i>   | 2.02 | 0.0005499 |
| 1560011_at   | prostate stem cell antigen                                                                  | <i>PSCA</i>      | 2.01 | 0.0006732 |
| 240265_at    | TRAF3 interacting protein 3                                                                 | <i>TRAF3IP3</i>  | 2.00 | 0.000548  |
| 222173_s_at  | TBC1 domain family, member 2                                                                | <i>TBC1D2</i>    | 1.96 | 0.0003099 |
| 238063_at    | transmembrane protein 154                                                                   | <i>TMEM154</i>   | 1.92 | 0.0007689 |
| 223592_s_at  | ring finger protein 135                                                                     | <i>RNF135</i>    | 1.91 | 0.000598  |
| 218700_s_at  | RAB7, member RAS oncogene family-like 1                                                     | <i>RAB7L1</i>    | 1.91 | 0.0009128 |
| 205746_s_at  | ADAM metalloproteinase domain 17 (tumor necrosis factor, alpha, converting enzyme)          | <i>ADAM17</i>    | 1.90 | 0.0001422 |
| 216176_at    | hepatocellular carcinoma-related HCRP1                                                      | <i>HCRP1</i>     | 1.90 | 0.0004144 |
| 209919_x_at  | gamma-glutamyltransferase 1                                                                 | <i>GGT1</i>      | 1.90 | 0.000392  |
| 201389_at    | integrin, alpha 5 (fibronectin receptor, alpha polypeptide)                                 | <i>ITGA5</i>     | 1.90 | 0.0006319 |
| 228923_at    | S100 calcium binding protein A6 (calcyclin)                                                 | <i>S100A6</i>    | 1.88 | 0.0009979 |
| 210422_x_at  | solute carrier family 11 (proton-coupled divalent metal ion transporters), member 1         | <i>SLC11A1</i>   | 1.87 | 0.0005206 |
| 207131_x_at  | gamma-glutamyltransferase 1                                                                 | <i>GGT1</i>      | 1.87 | 0.0006231 |
| 1555317_at   | polymerase (DNA directed) kappa                                                             | <i>POLK</i>      | 1.87 | 0.0003153 |
| 203460_s_at  | presenilin 1 (Alzheimer disease 3)                                                          | <i>PSEN1</i>     | 1.86 | 0.0002723 |
| 227766_at    | ligase IV, DNA, ATP-dependent                                                               | <i>LIG4</i>      | 1.86 | 0.0001341 |
| 223686_at    | thiamin pyrophosphokinase 1                                                                 | <i>TPK1</i>      | 1.85 | 0.000653  |
| 223591_at    | ring finger protein 135                                                                     | <i>RNF135</i>    | 1.84 | 0.0009946 |
| 222483_at    | EF-hand domain family, member D2                                                            | <i>EFHD2</i>     | 1.84 | 0.0005818 |
| 212120_at    | hypothetical LOC284988                                                                      | <i>LOC284988</i> | 1.84 | 0.0002808 |
| 205601_s_at  | homeobox B5                                                                                 | <i>HOXB5</i>     | 1.83 | 0.0009693 |
| 202625_at    | v-yes-1 Yamaguchi sarcoma viral related oncogene homolog                                    | <i>LYN</i>       | 1.82 | 0.0006747 |
| 242521_at    | Homo sapiens, Similar to neuronal thread protein, clone IMAGE:4106635, mRNA                 |                  | 1.81 | 0.0002627 |
| 222442_s_at  | ADP-ribosylation factor-like 8B                                                             | <i>ARL8B</i>     | 1.80 | 0.0004824 |
| 212587_s_at  | protein tyrosine phosphatase, receptor type, C                                              | <i>PTPRC</i>     | 1.79 | 7.57E-05  |
| 233122_at    | Keratinocyte associated protein 2 /// MRNA; cDNA DKFZp686L09144 (from clone DKFZp686L09144) | <i>KRTCAP2</i>   | 1.79 | 0.000337  |
| 34206_at     | centaurin, delta 2                                                                          | <i>CENTD2</i>    | 1.77 | 0.0001001 |
| 211417_x_at  | gamma-glutamyltransferase 1                                                                 | <i>GGT1</i>      | 1.76 | 0.0002583 |
| 221041_s_at  | solute carrier family 17 (anion/sugar transporter), member 5                                | <i>SLC17A5</i>   | 1.76 | 0.0003402 |
| 217852_s_at  | ADP-ribosylation factor-like 8B                                                             | <i>ARL8B</i>     | 1.76 | 0.0001793 |
| 208284_x_at  | gamma-glutamyltransferase 1                                                                 | <i>GGT1</i>      | 1.75 | 0.0005215 |
| 240481_at    | TRAF3 interacting protein 3                                                                 | <i>TRAF3IP3</i>  | 1.75 | 1.27E-05  |
| 217473_x_at  | solute carrier family 11 (proton-coupled divalent metal ion transporters), member 1         | <i>SLC11A1</i>   | 1.75 | 0.0002989 |
| 216322_at    | CD58 molecule                                                                               | <i>CD58</i>      | 1.73 | 0.0004905 |
| 230361_at    | hypothetical protein KIAA1833                                                               | <i>KIAA1833</i>  | 1.72 | 0.00026   |
| 206600_s_at  | solute carrier family 16, member 5 (monocarboxylic acid transporter 6)                      | <i>SLC16A5</i>   | 1.72 | 0.0004105 |
| 207545_s_at  | numb homolog (Drosophila)                                                                   | <i>NUMB</i>      | 1.72 | 0.0002913 |
| 243969_at    | solute carrier family 24 (sodium/potassium/calcium exchanger), member 4                     | <i>SLC24A4</i>   | 1.70 | 0.0006546 |
| 202626_s_at  | v-yes-1 Yamaguchi sarcoma viral related oncogene homolog                                    | <i>LYN</i>       | 1.69 | 0.0008566 |
| 1556747_a_at | CDNA FLJ39784 fis, clone SPLEN2002314                                                       |                  | 1.69 | 0.0003754 |
| 209370_s_at  | SH3-domain binding protein 2                                                                | <i>SH3BP2</i>    | 1.68 | 0.0002566 |
| 212685_s_at  | transducin (beta)-like 2                                                                    | <i>TBL2</i>      | 1.68 | 0.0008339 |
| 231099_at    | Solute carrier family 31 (copper transporters), member 2                                    | <i>SLC31A2</i>   | 1.68 | 0.0003979 |
| 1569004_at   | Homo sapiens, Similar to neuronal thread protein, clone IMAGE:4106635,                      |                  | 1.68 | 6.15E-05  |

|              | mRNA                                                                                                                                                                                                                                              |                                                                                                       |      |           |
|--------------|---------------------------------------------------------------------------------------------------------------------------------------------------------------------------------------------------------------------------------------------------|-------------------------------------------------------------------------------------------------------|------|-----------|
| 215151_at    | dedicator of cytokinesis 10                                                                                                                                                                                                                       | <i>DOCK10</i>                                                                                         | 1.68 | 0.0001527 |
| 226074_at    | protein phosphatase 1M (PP2C domain containing)                                                                                                                                                                                                   | <i>PPM1M</i>                                                                                          | 1.67 | 0.0003848 |
| 212119_at    | ras homolog gene family, member Q                                                                                                                                                                                                                 | <i>RHOQ</i>                                                                                           | 1.67 | 0.0004581 |
| 213375_s_at  | hypothetical gene CG018                                                                                                                                                                                                                           | <i>CG018</i>                                                                                          | 1.67 | 3.34E-05  |
| 211250_s_at  | SH3-domain binding protein 2                                                                                                                                                                                                                      | <i>SH3BP2</i>                                                                                         | 1.66 | 0.0005319 |
| 201126_s_at  | mannosyl (alpha-1,3-)-glycoprotein beta-1,2-N-acetylglucosaminyltransferase                                                                                                                                                                       | <i>MGAT1</i>                                                                                          | 1.66 | 0.0008469 |
| 200761_s_at  | ADP-ribosylation-like factor 6 interacting protein 5                                                                                                                                                                                              | <i>ARL6IP5</i>                                                                                        | 1.66 | 0.0008792 |
| 205277_at    | PR domain containing 2, with ZNF domain                                                                                                                                                                                                           | <i>PRDM2</i>                                                                                          | 1.66 | 3.35E-05  |
| 221641_s_at  | acyl-CoA thioesterase 9                                                                                                                                                                                                                           | <i>ACOT9</i>                                                                                          | 1.65 | 0.0003189 |
| 214449_s_at  | ras homolog gene family, member Q                                                                                                                                                                                                                 | <i>RHOQ</i>                                                                                           | 1.64 | 0.0008107 |
| 234942_s_at  | deoxynucleotidyltransferase, terminal, interacting protein 1                                                                                                                                                                                      | <i>DNTTIP1</i>                                                                                        | 1.64 | 0.0007521 |
| 204043_at    | transcobalamin II; macrocytic anemia                                                                                                                                                                                                              | <i>TCN2</i>                                                                                           | 1.64 | 0.0002417 |
| 206482_at    | PTK6 protein tyrosine kinase 6                                                                                                                                                                                                                    | <i>PTK6</i>                                                                                           | 1.63 | 3.30E-05  |
| 228341_at    | CDNA FLJ34034 fis, clone FCBBF2004671                                                                                                                                                                                                             |                                                                                                       | 1.63 | 0.0009001 |
| 1562608_at   | Transmembrane protein 144                                                                                                                                                                                                                         | <i>TMEM144</i>                                                                                        | 1.62 | 0.0006184 |
| 213590_at    | solute carrier family 16, member 5 (monocarboxylic acid transporter 6)                                                                                                                                                                            | <i>SLC16A5</i>                                                                                        | 1.62 | 0.0002214 |
| 1568623_a_at | solute carrier family 35, member E4                                                                                                                                                                                                               | <i>SLC35E4</i>                                                                                        | 1.61 | 6.92E-05  |
| 217197_x_at  | hypothetical gene CG018                                                                                                                                                                                                                           | <i>CG018</i>                                                                                          | 1.60 | 1.44E-05  |
| 206868_at    | START domain containing 8                                                                                                                                                                                                                         | <i>STARD8</i>                                                                                         | 1.59 | 5.40E-06  |
| 238816_at    | CDNA FLJ36867 fis, clone ASTRO2016491                                                                                                                                                                                                             |                                                                                                       | 1.59 | 0.0007242 |
| 212117_at    | ras homolog gene family, member Q                                                                                                                                                                                                                 | <i>RHOQ</i>                                                                                           | 1.58 | 0.000237  |
| 205745_x_at  | ADAM metallopeptidase domain 17 (tumor necrosis factor, alpha, converting enzyme)                                                                                                                                                                 | <i>ADAM17</i>                                                                                         | 1.58 | 9.47E-05  |
| 218821_at    | aminopeptidase-like 1                                                                                                                                                                                                                             | <i>NPEPL1</i>                                                                                         | 1.58 | 0.000476  |
| 206235_at    | ligase IV, DNA, ATP-dependent                                                                                                                                                                                                                     | <i>LIG4</i>                                                                                           | 1.58 | 0.000236  |
| 212948_at    | calmodulin binding transcription activator 2                                                                                                                                                                                                      | <i>CAMTA2</i>                                                                                         | 1.57 | 0.0007642 |
| 214195_at    | tripeptidyl peptidase I                                                                                                                                                                                                                           | <i>TPPI</i>                                                                                           | 1.57 | 0.0002931 |
| 1567559_s_at | triggering receptor expressed on myeloid cells-like 4 /// triggering receptor expressed on myeloid cells-like 3                                                                                                                                   | <i>TREML4</i> ///<br><i>TREML3</i>                                                                    | 1.57 | 0.0004198 |
| 214681_at    | glycerol kinase                                                                                                                                                                                                                                   | <i>GK</i>                                                                                             | 1.57 | 0.0002659 |
| 215603_x_at  | gamma-glutamyltransferase 1 /// gamma-glutamyltransferase 2 /// gamma-glutamyltransferase-like 4 /// similar to gamma-glutamyltransferase 2 /// similar to Gamma-glutamyltranspeptidase 1 precursor (Gamma-glutamyltransferase 1) (CD224 antigen) | <i>GGT1</i> ///<br><i>GGT2</i> ///<br><i>GGTLA</i> ///<br><i>LOC643009</i><br>///<br><i>LOC653257</i> | 1.56 | 0.0002188 |
| 227098_at    | dual specificity phosphatase 18                                                                                                                                                                                                                   | <i>DUSP18</i>                                                                                         | 1.56 | 4.93E-05  |
| 219104_at    | ring finger protein 141                                                                                                                                                                                                                           | <i>RNF141</i>                                                                                         | 1.56 | 0.0006636 |
| 1562321_at   | pyruvate dehydrogenase kinase, isozyme 4                                                                                                                                                                                                          | <i>PKD4</i>                                                                                           | 1.55 | 0.0001894 |
| 226577_at    | CDNA FLJ36867 fis, clone ASTRO2016491                                                                                                                                                                                                             |                                                                                                       | 1.55 | 0.000362  |
| 224846_at    | SH3KBP1 binding protein 1                                                                                                                                                                                                                         | <i>SHKBP1</i>                                                                                         | 1.55 | 0.0004526 |
| 212516_at    | centaurin, delta 2                                                                                                                                                                                                                                | <i>CENTD2</i>                                                                                         | 1.51 | 0.0005174 |
| 219620_x_at  | hypothetical protein FLJ20245                                                                                                                                                                                                                     | <i>FLJ20245</i>                                                                                       | 1.51 | 0.0007415 |
| 213798_s_at  | CAP, adenylate cyclase-associated protein 1 (yeast)                                                                                                                                                                                               | <i>CAP1</i>                                                                                           | 1.51 | 0.0001402 |
| 205781_at    | chromosome 16 open reading frame 7                                                                                                                                                                                                                | <i>C16orf7</i>                                                                                        | 1.50 | 8.49E-05  |
| 217416_x_at  |                                                                                                                                                                                                                                                   |                                                                                                       | 1.50 | 0.0005004 |
| 200625_s_at  | CAP, adenylate cyclase-associated protein 1 (yeast)                                                                                                                                                                                               | <i>CAP1</i>                                                                                           | 1.50 | 0.0006223 |
| 217909_s_at  | MAX-like protein X                                                                                                                                                                                                                                | <i>MLX</i>                                                                                            | 1.50 | 0.0009422 |
| 227352_at    | chromosome 19 open reading frame 39                                                                                                                                                                                                               | <i>C19orf39</i>                                                                                       | 1.49 | 0.0006523 |
| 211416_x_at  | gamma-glutamyltransferase-like activity 4                                                                                                                                                                                                         | <i>GGTLA4</i>                                                                                         | 1.49 | 6.90E-05  |
| 242956_at    | Isocitrate dehydrogenase 1 (NADP+), soluble                                                                                                                                                                                                       | <i>IDH1</i>                                                                                           | 1.49 | 0.0002917 |
| 227954_at    | hypothetical protein LOC162073                                                                                                                                                                                                                    | <i>LOC162073</i>                                                                                      | 1.49 | 0.000566  |

|             |                                                                                                                  |                                             |      |           |
|-------------|------------------------------------------------------------------------------------------------------------------|---------------------------------------------|------|-----------|
| 237264_at   | Ring finger protein 13                                                                                           | <i>RNF13</i>                                | 1.47 | 0.0001027 |
| 226306_at   | chromosome 6 open reading frame 1                                                                                | <i>C6orf1</i>                               | 1.46 | 0.000522  |
| 222127_s_at | exocyst complex component 1                                                                                      | <i>EXOC1</i>                                | 1.46 | 0.000836  |
| 214906_x_at | hypothetical gene CG018                                                                                          | <i>CG018</i>                                | 1.45 | 0.0001053 |
| 223261_at   | polymerase (DNA directed) kappa                                                                                  | <i>POLK</i>                                 | 1.45 | 0.0003003 |
| 228968_at   | zinc finger protein 449                                                                                          | <i>ZNF449</i>                               | 1.43 | 0.0006003 |
| 203912_s_at | deoxyribonuclease I-like 1                                                                                       | <i>DNASE1L1</i>                             | 1.43 | 0.0005296 |
| 222799_at   | HSPC049 protein                                                                                                  | <i>HSPC049</i>                              | 1.43 | 0.0004919 |
| 203278_s_at | PHD finger protein 21A                                                                                           | <i>PHF21A</i>                               | 1.43 | 0.0005486 |
| 214121_x_at | PDZ and LIM domain 7 (enigma)                                                                                    | <i>PDLIM7</i>                               | 1.43 | 0.0004867 |
| 224825_at   | deoxynucleotidyltransferase, terminal, interacting protein 1                                                     | <i>DNTTIP1</i>                              | 1.41 | 0.0003835 |
| 224065_at   | homeodomain interacting protein kinase 2                                                                         | <i>HIPK2</i>                                | 1.40 | 0.0008998 |
| 217910_x_at | MAX-like protein X                                                                                               | <i>MLX</i>                                  | 1.40 | 0.0004169 |
| 206341_at   | interleukin 2 receptor, alpha                                                                                    | <i>IL2RA</i>                                | 1.39 | 0.0001002 |
| 210128_s_at | leukotriene B4 receptor                                                                                          | <i>LTB4R</i>                                | 1.39 | 0.0006351 |
| 210205_at   | UDP-Gal:betaGlcNAc beta 1,3-galactosyltransferase, polypeptide 4                                                 | <i>B3GALT4</i>                              | 1.39 | 0.0001877 |
| 202357_s_at | complement factor B                                                                                              | <i>CFB</i>                                  | 1.38 | 0.0004686 |
| 242871_at   | progesterin and adipoQ receptor family member V                                                                  | <i>PAQR5</i>                                | 1.38 | 0.0007483 |
| 207122_x_at | sulfotransferase family, cytosolic, 1A, phenol-preferring, member 2                                              | <i>SULT1A2</i>                              | 1.37 | 0.0006894 |
| 47083_at    | chromosome 7 open reading frame 26                                                                               | <i>C7orf26</i>                              | 0.74 | 0.0002948 |
| 217804_s_at | interleukin enhancer binding factor 3, 90kDa                                                                     | <i>ILF3</i>                                 | 0.73 | 0.0006928 |
| 201919_at   | Solute carrier family 25, member 36                                                                              | <i>SLC25A36</i>                             | 0.73 | 0.0009325 |
| 202268_s_at | amyloid beta precursor protein binding protein 1                                                                 | <i>APPBP1</i>                               | 0.72 | 0.0007942 |
| 209056_s_at | CDC5 cell division cycle 5-like (S. pombe)                                                                       | <i>CDC5L</i>                                | 0.72 | 0.0008106 |
| 223742_at   | mitochondrial ribosomal protein L4                                                                               | <i>MRPL4</i>                                | 0.72 | 0.000961  |
| 218954_s_at | BRF2, subunit of RNA polymerase III transcription initiation factor, BRF1-like                                   | <i>BRF2</i>                                 | 0.72 | 0.0003707 |
| 221940_at   | RNA pseudouridylate synthase domain containing 2                                                                 | <i>RPUSD2</i>                               | 0.72 | 0.0005868 |
| 209139_s_at | protein kinase, interferon-inducible double stranded RNA dependent activator                                     | <i>PRKRA</i>                                | 0.72 | 0.0006977 |
| 202919_at   | preimplantation protein 3                                                                                        | <i>PREI3</i>                                | 0.72 | 0.0008599 |
| 226572_at   | Suppressor of cytokine signaling 7                                                                               | <i>SOCS7</i>                                | 0.72 | 0.0003692 |
| 202230_s_at | calcium homeostasis endoplasmic reticulum protein                                                                | <i>CHERP</i>                                | 0.71 | 0.0005509 |
| 221749_at   | YTH domain family, member 3                                                                                      | <i>YTHDF3</i>                               | 0.71 | 0.0009749 |
| 213794_s_at | neuroguidin, EIF4E binding protein                                                                               | <i>NGDN</i>                                 | 0.71 | 0.0001023 |
| 1558942_at  | zinc finger protein 765                                                                                          | <i>ZNF765</i>                               | 0.71 | 7.00E-04  |
| 202396_at   | transcription elongation regulator 1                                                                             | <i>TCERG1</i>                               | 0.70 | 0.0001595 |
| 225906_at   | CDNA FLJ38264 fis, clone FCBBF3001657                                                                            |                                             | 0.70 | 0.0002669 |
| 220607_x_at | TH1-like (Drosophila)                                                                                            | <i>TH1L</i>                                 | 0.70 | 0.0005249 |
| 225006_x_at | TH1-like (Drosophila)                                                                                            | <i>TH1L</i>                                 | 0.70 | 0.0008865 |
| 225261_x_at | TH1-like (Drosophila)                                                                                            | <i>TH1L</i>                                 | 0.70 | 0.0009768 |
| 211375_s_at | interleukin enhancer binding factor 3, 90kDa                                                                     | <i>ILF3</i>                                 | 0.70 | 0.0007373 |
| 230588_s_at | hypothetical protein LOC285074 /// similar to anaphase promoting complex subunit 1                               | <i>LOC285074</i><br>///<br><i>LOC653663</i> | 0.70 | 0.0005761 |
| 204847_at   | zinc finger and BTB domain containing 11                                                                         | <i>ZBTB11</i>                               | 0.70 | 0.0006209 |
| 202560_s_at | chromosome 1 open reading frame 77                                                                               | <i>C1orf77</i>                              | 0.70 | 0.0008555 |
| 223005_s_at | chromosome 9 open reading frame 5                                                                                | <i>C9orf5</i>                               | 0.69 | 0.0007256 |
| 217830_s_at | NSFL1 (p97) cofactor (p47)                                                                                       | <i>NSFL1C</i>                               | 0.69 | 0.0007806 |
| 200052_s_at | interleukin enhancer binding factor 2, 45kDa                                                                     | <i>ILF2</i>                                 | 0.69 | 0.0002613 |
| 206095_s_at | FUS interacting protein (serine/arginine-rich) 1 /// similar to FUS interacting protein (serine-arginine rich) 1 | <i>FUSIP1</i> ///<br><i>LOC642558</i>       | 0.69 | 2.05E-05  |
| 212348_s_at | amine oxidase (flavin containing) domain 2                                                                       | <i>AOF2</i>                                 | 0.69 | 0.0003289 |
| 215773_x_at | poly (ADP-ribose) polymerase family, member 2                                                                    | <i>PARP2</i>                                | 0.69 | 0.0009797 |

|              |                                                                                                   |                     |      |           |
|--------------|---------------------------------------------------------------------------------------------------|---------------------|------|-----------|
| 207941_s_at  | RNA binding motif protein 39                                                                      | <i>RBM39</i>        | 0.69 | 0.0001652 |
| 212060_at    | U2-associated SR140 protein                                                                       | <i>SR140</i>        | 0.69 | 0.000347  |
| 207112_s_at  | GRB2-associated binding protein 1                                                                 | <i>GAB1</i>         | 0.69 | 0.0003457 |
| 221158_at    | chromosome 21 open reading frame 66                                                               | <i>C21orf66</i>     | 0.69 | 0.0004498 |
| 225865_x_at  | TH1-like (Drosophila)                                                                             | <i>TH1L</i>         | 0.69 | 0.0004849 |
| 202968_s_at  | dual-specificity tyrosine-(Y)-phosphorylation regulated kinase 2                                  | <i>DYRK2</i>        | 0.68 | 0.0001992 |
| 240222_at    | COP9 constitutive photomorphogenic homolog subunit 8 (Arabidopsis)                                | <i>COPS8</i>        | 0.68 | 0.0007812 |
| 244092_at    | zinc finger, RAN-binding domain containing 3                                                      | <i>ZRANB3</i>       | 0.68 | 0.0005096 |
| 222430_s_at  | YTH domain family, member 2                                                                       | <i>YTHDF2</i>       | 0.68 | 0.000199  |
| 204752_x_at  | poly (ADP-ribose) polymerase family, member 2                                                     | <i>PARP2</i>        | 0.68 | 0.0003664 |
| 222703_s_at  | yrnC domain containing (E. coli)                                                                  | <i>YRDC</i>         | 0.68 | 0.000678  |
| 202078_at    | COP9 constitutive photomorphogenic homolog subunit 3 (Arabidopsis)                                | <i>COPS3</i>        | 0.68 | 1.38E-05  |
| 225157_at    | MLX interacting protein                                                                           | <i>MLXIP</i>        | 0.68 | 0.0009909 |
| 243176_at    | CDNA FLJ30090 fis, clone BNGH41000015                                                             |                     | 0.68 | 0.0009659 |
| 218478_s_at  | zinc finger, CCHC domain containing 8                                                             | <i>ZCCHC8</i>       | 0.68 | 0.0002553 |
| 201178_at    | F-box protein 7                                                                                   | <i>FBX07</i>        | 0.67 | 0.0004501 |
| 219198_at    | general transcription factor IIIC, polypeptide 4, 90kDa                                           | <i>GTF3C4</i>       | 0.67 | 0.0004279 |
| 228380_at    | Transcribed locus, moderately similar to NP_689672.2 hypothetical protein MGC45438 [Homo sapiens] |                     | 0.67 | 0.0006192 |
| 229428_at    | Poly (ADP-ribose) glycohydrolase                                                                  | <i>PARG</i>         | 0.66 | 0.0008192 |
| 213730_x_at  | transcription factor 3 (E2A immunoglobulin enhancer binding factors E12/E47)                      | <i>TCF3</i>         | 0.66 | 0.000233  |
| 212973_at    | ribose 5-phosphate isomerase A (ribose 5-phosphate epimerase)                                     | <i>RPIA</i>         | 0.66 | 0.00053   |
| 65591_at     | WD repeat domain 48                                                                               | <i>WDR48</i>        | 0.66 | 0.000705  |
| 235037_at    | transmembrane protein 41A                                                                         | <i>TMEM41A</i>      | 0.65 | 0.0005426 |
| 208811_s_at  | DnaJ (Hsp40) homolog, subfamily B, member 6                                                       | <i>DNAJB6</i>       | 0.65 | 2.98E-05  |
| 212030_at    | RNA binding motif protein 25                                                                      | <i>RBM25</i>        | 0.65 | 0.0001225 |
| 226990_at    | GPI-anchored membrane protein 1                                                                   | <i>GPIAP1</i>       | 0.65 | 0.0006658 |
| 236477_at    | PRP40 pre-mRNA processing factor 40 homolog A (yeast)                                             | <i>PRPF40A</i>      | 0.65 | 0.0008693 |
| 200993_at    | importin 7                                                                                        | <i>IPO7</i>         | 0.65 | 0.0003838 |
| 1554423_a_at | F-box protein 7                                                                                   | <i>FBX07</i>        | 0.65 | 0.0001647 |
| 1557954_at   | chromosome X open reading frame 15                                                                | <i>CXorf15</i>      | 0.64 | 0.000483  |
| 211081_s_at  | mitogen-activated protein kinase kinase kinase kinase 5                                           | <i>MAP4K5</i>       | 0.64 | 0.0001311 |
| 213811_x_at  | transcription factor 3 (E2A immunoglobulin enhancer binding factors E12/E47)                      | <i>TCF3</i>         | 0.64 | 0.0005413 |
| 208810_at    | DnaJ (Hsp40) homolog, subfamily B, member 6                                                       | <i>DNAJB6</i>       | 0.64 | 0.0002651 |
| 205284_at    | KIAA0133                                                                                          | <i>KIAA0133</i>     | 0.64 | 0.0005368 |
| 208115_x_at  | chromosome 10 open reading frame 137                                                              | <i>C10orf137</i>    | 0.64 | 0.0007839 |
| 227617_at    | hypothetical protein LOC199953                                                                    | <i>RP13-15M17.2</i> | 0.64 | 0.0002004 |
| 207515_s_at  | polymerase (RNA) I polypeptide C, 30kDa                                                           | <i>POLR1C</i>       | 0.63 | 0.0002622 |
| 202969_at    | MRNA; cDNA DKFZp667B0924 (from clone DKFZp667B0924)                                               |                     | 0.63 | 0.0007744 |
| 204568_at    | KIAA0831                                                                                          | <i>KIAA0831</i>     | 0.63 | 0.0004058 |
| 202883_s_at  | protein phosphatase 2 (formerly 2A), regulatory subunit A (PR 65), beta isoform                   | <i>PPP2R1B</i>      | 0.63 | 7.72E-05  |
| 218128_at    | nuclear transcription factor Y, beta                                                              | <i>NFYB</i>         | 0.63 | 0.0004935 |
| 230274_s_at  | Nucleoporin 88kDa                                                                                 | <i>NUP88</i>        | 0.63 | 0.0008833 |
| 219212_at    | heat shock 70kDa protein 14                                                                       | <i>HSPA14</i>       | 0.62 | 5.40E-06  |
| 237299_at    | Transcribed locus                                                                                 |                     | 0.62 | 0.0003018 |
| 225455_at    | transcriptional adaptor 1 (HFI1 homolog, yeast)-like                                              | <i>TADA1L</i>       | 0.62 | 0.0004717 |
| 223297_at    | hypothetical protein MGC4268                                                                      | <i>MGC4268</i>      | 0.62 | 0.0005147 |
| 218544_s_at  | RNA terminal phosphate cyclase-like 1                                                             | <i>RCL1</i>         | 0.62 | 0.0009185 |
| 227520_at    | chromosome X open reading frame 15                                                                | <i>CXorf15</i>      | 0.62 | 0.0006187 |
| 225998_at    | GRB2-associated binding protein 1                                                                 | <i>GAB1</i>         | 0.62 | 0.0008424 |

|              |                                                                                                      |                  |      |           |
|--------------|------------------------------------------------------------------------------------------------------|------------------|------|-----------|
| 1554251_at   | heterochromatin protein 1, binding protein 3                                                         | <i>HP1BP3</i>    | 0.62 | 0.0003535 |
| 218127_at    | nuclear transcription factor Y, beta                                                                 | <i>NFYB</i>      | 0.62 | 0.0001648 |
| 65588_at     | hypothetical LOC388796                                                                               | <i>LOC388796</i> | 0.61 | 5.00E-06  |
| 204244_s_at  | DBF4 homolog ( <i>S. cerevisiae</i> )                                                                | <i>DBF4</i>      | 0.61 | 0.0001619 |
| 201947_s_at  | chaperonin containing TCP1, subunit 2 (beta)                                                         | <i>CCT2</i>      | 0.61 | 0.0002139 |
| 210776_x_at  | transcription factor 3 (E2A immunoglobulin enhancer binding factors E12/E47)                         | <i>TCF3</i>      | 0.61 | 0.0002228 |
| 225857_s_at  | hypothetical LOC388796                                                                               | <i>LOC388796</i> | 0.61 | 7.80E-06  |
| 229594_at    | SPT2, Suppressor of Ty, domain containing 1 ( <i>S. cerevisiae</i> )                                 | <i>SPTY2D1</i>   | 0.61 | 0.0001053 |
| 226687_at    | PRP40 pre-mRNA processing factor 40 homolog A (yeast)                                                | <i>PRPF40A</i>   | 0.60 | 4.45E-05  |
| 203358_s_at  | enhancer of zeste homolog 2 ( <i>Drosophila</i> )                                                    | <i>EZH2</i>      | 0.60 | 0.0001735 |
| 222405_at    | similar to butyrate-induced transcript 1                                                             | <i>LOC652500</i> | 0.60 | 0.0005045 |
| 236379_at    | Erythrocyte membrane protein band 4.1 (elliptocytosis 1, RH-linked)                                  | <i>EPB41</i>     | 0.60 | 0.0008447 |
| 209317_at    | polymerase (RNA) I polypeptide C, 30kDa                                                              | <i>POLR1C</i>    | 0.59 | 0.0001252 |
| 201946_s_at  | chaperonin containing TCP1, subunit 2 (beta)                                                         | <i>CCT2</i>      | 0.59 | 0.0001335 |
| 244103_at    | chromosome 1 open reading frame 55                                                                   | <i>C1orf55</i>   | 0.59 | 0.0005025 |
| 212739_s_at  | non-metastatic cells 4, protein expressed in                                                         | <i>NME4</i>      | 0.59 | 0.0004408 |
| 239794_at    | Isoleucine-tRNA synthetase                                                                           | <i>IARS</i>      | 0.59 | 0.0004463 |
| 227993_at    | methionyl aminopeptidase 2                                                                           | <i>METAP2</i>    | 0.59 | 0.0001066 |
| 244304_at    | hypothetical protein MGC42174                                                                        | <i>MGC42174</i>  | 0.58 | 0.0001755 |
| 222623_s_at  | zinc finger protein 639                                                                              | <i>ZNF639</i>    | 0.58 | 0.0003901 |
| 209273_s_at  | HESB like domain containing 2                                                                        | <i>HBLD2</i>     | 0.58 | 0.0007163 |
| 218192_at    | inositol hexaphosphate kinase 2                                                                      | <i>IHPK2</i>     | 0.58 | 1.16E-05  |
| 53987_at     | RAN binding protein 10                                                                               | <i>RANBP10</i>   | 0.58 | 5.80E-05  |
| 205135_s_at  | nuclear fragile X mental retardation protein interacting protein 1                                   | <i>NUFIP1</i>    | 0.58 | 0.0001658 |
| 216226_at    | TAF4b RNA polymerase II, TATA box binding protein (TBP)-associated factor, 105kDa                    | <i>TAF4B</i>     | 0.58 | 0.0002697 |
| 207332_s_at  | transferrin receptor (p90, CD71)                                                                     | <i>TFRC</i>      | 0.58 | 0.0005208 |
| 230479_at    | Transcribed locus                                                                                    |                  | 0.57 | 0.0001006 |
| 228378_at    | chromosome 12 open reading frame 29                                                                  | <i>C12orf29</i>  | 0.57 | 0.0003924 |
| 202353_s_at  | proteasome (prosome, macropain) 26S subunit, non-ATPase, 12                                          | <i>PSMD12</i>    | 0.57 | 0.0008792 |
| 221735_at    | WD repeat domain 48                                                                                  | <i>WDR48</i>     | 0.57 | 0.0003617 |
| 1556060_a_at | KIAA1702 protein                                                                                     | <i>KIAA1702</i>  | 0.57 | 0.0007966 |
| 226370_at    | kelch-like 15 ( <i>Drosophila</i> )                                                                  | <i>KLHL15</i>    | 0.57 | 9.36E-05  |
| 221821_s_at  | chromosome 12 open reading frame 41                                                                  | <i>C12orf41</i>  | 0.57 | 2.00E-06  |
| 221809_at    | RAN binding protein 10                                                                               | <i>RANBP10</i>   | 0.57 | 5.03E-05  |
| 210054_at    | chromosome 4 open reading frame 15                                                                   | <i>C4orf15</i>   | 0.57 | 2.61E-05  |
| 213899_at    | methionyl aminopeptidase 2                                                                           | <i>METAP2</i>    | 0.56 | 7.05E-05  |
| 222157_s_at  | WD repeat domain 48                                                                                  | <i>WDR48</i>     | 0.56 | 0.0002384 |
| 219037_at    | CGI-115 protein                                                                                      | <i>CGI-115</i>   | 0.56 | 0.0003837 |
| 212061_at    | U2-associated SR140 protein                                                                          | <i>SR140</i>     | 0.56 | 0.0006201 |
| 209711_at    | solute carrier family 35 (UDP-glucuronic acid/UDP-N-acetylgalactosamine dual transporter), member D1 | <i>SLC35D1</i>   | 0.56 | 0.0009729 |
| 217961_at    | hypothetical protein FLJ20551                                                                        | <i>FLJ20551</i>  | 0.56 | 6.02E-05  |
| 235170_at    | zinc finger protein 92                                                                               | <i>ZNF92</i>     | 0.55 | 0.0001342 |
| 221517_s_at  | cofactor required for Sp1 transcriptional activation, subunit 6, 77kDa                               | <i>CRSP6</i>     | 0.55 | 2.04E-05  |
| 225051_at    | erythrocyte membrane protein band 4.1 (elliptocytosis 1, RH-linked)                                  | <i>EPB41</i>     | 0.55 | 0.0004301 |
| 212665_at    | TCDD-inducible poly(ADP-ribose) polymerase                                                           | <i>TIPARP</i>    | 0.54 | 0.0004431 |
| 222404_x_at  | protein tyrosine phosphatase-like A domain containing 1                                              | <i>PTPLAD1</i>   | 0.54 | 0.0007638 |
| 200995_at    | Importin 7                                                                                           | <i>IPO7</i>      | 0.54 | 0.0001826 |
| 222624_s_at  | zinc finger protein 639                                                                              | <i>ZNF639</i>    | 0.54 | 0.0008422 |
| 209274_s_at  | HESB like domain containing 2                                                                        | <i>HBLD2</i>     | 0.53 | 0.0006372 |
| 221932_s_at  | glutaredoxin 5 homolog ( <i>S. cerevisiae</i> )                                                      | <i>GLRX5</i>     | 0.53 | 0.0007867 |

|             |                                                                                                |                                      |      |           |
|-------------|------------------------------------------------------------------------------------------------|--------------------------------------|------|-----------|
| 235061_at   | protein phosphatase 1K (PP2C domain containing)                                                | <i>PPM1K</i>                         | 0.53 | 0.0009434 |
| 230129_at   | chromosome 10 open reading frame 89                                                            | <i>C10orf89</i>                      | 0.53 | 0.0003209 |
| 217777_s_at | protein tyrosine phosphatase-like A domain containing 1                                        | <i>PTPLAD1</i>                       | 0.52 | 0.0002906 |
| 222666_s_at | RNA terminal phosphate cyclase-like 1                                                          | <i>RCL1</i>                          | 0.52 | 4.50E-06  |
| 228605_at   | CDNA FLJ30010 fis, clone 3NB692000154                                                          |                                      | 0.52 | 0.0001339 |
| 222565_s_at | protein kinase D3                                                                              | <i>PRKD3</i>                         | 0.52 | 0.0005269 |
| 237215_s_at | transferrin receptor (p90, CD71)                                                               | <i>TFRC</i>                          | 0.51 | 0.0001339 |
| 203795_s_at | B-cell CLL/lymphoma 7A                                                                         | <i>BCL7A</i>                         | 0.51 | 8.16E-05  |
| 237194_at   | Tetraspanin 5                                                                                  | <i>TSPAN5</i>                        | 0.48 | 0.0005925 |
| 209826_at   | EGF-like-domain, multiple 8 /// similar to palmitoyl-protein thioesterase 2                    | <i>EGFL8</i> ///<br><i>LOC653870</i> | 0.48 | 0.0002465 |
| 218756_s_at | short-chain dehydrogenase/reductase                                                            | <i>MGC4172</i>                       | 0.48 | 0.0003988 |
| 229256_at   | phosphoglucomutase 2-like 1                                                                    | <i>PGM2L1</i>                        | 0.48 | 0.0009557 |
| 218883_s_at | MLF1 interacting protein                                                                       | <i>MLF1IP</i>                        | 0.46 | 0.0004019 |
| 235020_at   | TAF4b RNA polymerase II, TATA box binding protein (TBP)-associated factor, 105kDa              | <i>TAF4B</i>                         | 0.45 | 4.89E-05  |
| 209064_x_at | poly(A) binding protein interacting protein 1                                                  | <i>PAIP1</i>                         | 0.45 | 5.68E-05  |
| 208051_s_at | poly(A) binding protein interacting protein 1                                                  | <i>PAIP1</i>                         | 0.44 | 5.86E-05  |
| 220306_at   | family with sequence similarity 46, member C                                                   | <i>FAM46C</i>                        | 0.43 | 0.0008025 |
| 203116_s_at | ferrochelatase (protoporphyrin)                                                                | <i>FECH</i>                          | 0.41 | 0.0004223 |
| 211658_at   | peroxiredoxin 2                                                                                | <i>PRDX2</i>                         | 0.41 | 0.000567  |
| 218236_s_at | protein kinase D3                                                                              | <i>PRKD3</i>                         | 0.39 | 0.0003232 |
| 203502_at   | 2,3-bisphosphoglycerate mutase                                                                 | <i>BPGM</i>                          | 0.37 | 0.0002845 |
| 204917_s_at | myeloid/lymphoid or mixed-lineage leukemia (trithorax homolog, Drosophila); translocated to, 3 | <i>MLLT3</i>                         | 0.37 | 0.0007285 |
| 206077_at   | Kell blood group, metalloendopeptidase                                                         | <i>KEL</i>                           | 0.36 | 0.000947  |
| 204951_at   | ras homolog gene family, member H                                                              | <i>RHOH</i>                          | 0.36 | 0.0004224 |
| 208501_at   | growth factor independent 1B (potential regulator of CDKN1A, translocated in CML)              | <i>GFI1B</i>                         | 0.36 | 0.0002145 |
| 210473_s_at | G protein-coupled receptor 125                                                                 | <i>GPR125</i>                        | 0.33 | 0.0001269 |
| 210504_at   | Kruppel-like factor 1 (erythroid)                                                              | <i>KLF1</i>                          | 0.32 | 0.0007895 |
| 239142_at   | LOC317671                                                                                      | <i>LOC317671</i>                     | 0.32 | 0.0008714 |
| 204018_x_at | hemoglobin, alpha 1 /// hemoglobin, alpha 2                                                    | <i>HBA1</i> ///<br><i>HBA2</i>       | 0.30 | 0.000691  |
| 202947_s_at | glycophorin C (Gerbich blood group)                                                            | <i>GYPC</i>                          | 0.30 | 0.0002459 |
| 205632_s_at | phosphatidylinositol-4-phosphate 5-kinase, type I, beta                                        | <i>PIP5K1B</i>                       | 0.30 | 0.0002694 |
| 205268_s_at | adducin 2 (beta)                                                                               | <i>ADD2</i>                          | 0.30 | 0.0002185 |
| 211745_x_at | hemoglobin, alpha 1                                                                            | <i>HBA1</i>                          | 0.30 | 0.0007297 |
| 217414_x_at | hemoglobin, alpha 1 /// hemoglobin, alpha 2                                                    | <i>HBA1</i> ///<br><i>HBA2</i>       | 0.30 | 0.0009184 |
| 209458_x_at | hemoglobin, alpha 1 /// hemoglobin, alpha 2                                                    | <i>HBA1</i> ///<br><i>HBA2</i>       | 0.29 | 0.000579  |
| 223708_at   | C1q and tumor necrosis factor related protein 4                                                | <i>CIQTNF4</i>                       | 0.27 | 0.0009032 |
| 1569652_at  | Myeloid/lymphoid or mixed-lineage leukemia (trithorax homolog, Drosophila); translocated to, 3 | <i>MLLT3</i>                         | 0.26 | 0.0006042 |
| 211699_x_at | hemoglobin, alpha 1 /// hemoglobin, alpha 2                                                    | <i>HBA1</i> ///<br><i>HBA2</i>       | 0.25 | 0.0005855 |
| 210746_s_at | erythrocyte membrane protein band 4.2                                                          | <i>EPB42</i>                         | 0.23 | 0.0004986 |
| 211560_s_at | aminolevulinic acid, delta-, synthase 2 (sideroblastic/hypochromic anemia)                     | <i>ALAS2</i>                         | 0.20 | 0.0007296 |
| 203949_at   | myeloperoxidase                                                                                | <i>MPO</i>                           | 0.20 | 0.0002837 |
| 205592_at   | interleukin 8                                                                                  | <i>IL8</i>                           | 0.19 | 0.0008662 |
| 206698_at   | X-linked Kx blood group (McLeod syndrome)                                                      | <i>XK</i>                            | 0.19 | 0.0003189 |
| 223670_s_at | hemogen                                                                                        | <i>HEMGN</i>                         | 0.19 | 0.0005897 |

|             |                                 |              |      |           |
|-------------|---------------------------------|--------------|------|-----------|
| 203948_s_at | myeloperoxidase                 | <i>MPO</i>   | 0.18 | 0.000286  |
| 219672_at   | erythroid associated factor     | <i>ERAF</i>  | 0.18 | 0.0007403 |
| 211820_x_at | glycophorin A (MNS blood group) | <i>GYPA</i>  | 0.17 | 0.0006763 |
| 39729_at    | peroxiredoxin 2                 | <i>PRDX2</i> | 0.15 | 0.0001049 |
