# Supplementary material
Source: PubMed Central journal article supplement (PMC2214747)
Supplement: blood_blood-2007-08-107946_3.pdf [file blood_blood-2007-08-107946_3.pdf]

| Probe set   | Description                                                                                    | Gene symbol                    | Fold-change: TKD/WT |
|-------------|------------------------------------------------------------------------------------------------|--------------------------------|---------------------|
| 218478_s_at | zinc finger, CCHC domain containing 8                                                          | <i>ZCCHC8</i>                  | 0.68                |
| 204847_at   | zinc finger and BTB domain containing 11                                                       | <i>ZBTB11</i>                  | 0.70                |
| 212665_at   | TCDD-inducible poly(ADP-ribose) polymerase                                                     | <i>TIPARP</i>                  | 0.54                |
| 203948_s_at | myeloperoxidase                                                                                | <i>MPO</i>                     | 0.18                |
| 203949_at   | myeloperoxidase                                                                                | <i>MPO</i>                     | 0.20                |
| 207332_s_at | transferrin receptor (p90, CD71)                                                               | <i>TFRC</i>                    | 0.58                |
| 237215_s_at | transferrin receptor (p90, CD71)                                                               | <i>TFRC</i>                    | 0.51                |
| 1569652_at  | Myeloid/lymphoid or mixed-lineage leukemia (trithorax homolog, Drosophila); translocated to, 3 | <i>MLLT3</i>                   | 0.26                |
| 204917_s_at | myeloid/lymphoid or mixed-lineage leukemia (trithorax homolog, Drosophila); translocated to, 3 | <i>MLLT3</i>                   | 0.37                |
| 237299_at   | Transcribed locus                                                                              |                                | 0.62                |
| 211699_x_at | hemoglobin, alpha 1 /// hemoglobin, alpha 2                                                    | <i>HBA1</i> ///<br><i>HBA2</i> | 0.25                |
| 217414_x_at | hemoglobin, alpha 1 /// hemoglobin, alpha 2                                                    | <i>HBA1</i> ///<br><i>HBA2</i> | 0.30                |
| 204018_x_at | hemoglobin, alpha 1 /// hemoglobin, alpha 2                                                    | <i>HBA1</i> ///<br><i>HBA2</i> | 0.30                |
| 209458_x_at | hemoglobin, alpha 1 /// hemoglobin, alpha 2                                                    | <i>HBA1</i> ///<br><i>HBA2</i> | 0.29                |
| 211745_x_at | hemoglobin, alpha 1                                                                            | <i>HBA1</i>                    | 0.30                |
| 203502_at   | 2,3-bisphosphoglycerate mutase                                                                 | <i>BPGM</i>                    | 0.37                |
| 211560_s_at | aminolevulinate, delta-, synthase 2 (sideroblastic/hypochromic anemia)                         | <i>ALAS2</i>                   | 0.20                |
| 205592_at   | interleukin 8                                                                                  | <i>IL8</i>                     | 0.19                |
| 219672_at   | erythroid associated factor                                                                    | <i>ERAF</i>                    | 0.18                |
| 210746_s_at | erythrocyte membrane protein band 4.2                                                          | <i>EPB42</i>                   | 0.23                |
| 211820_x_at | glycophorin A (MNS blood group)                                                                | <i>GYP A</i>                   | 0.17                |
| 223670_s_at | hemogen                                                                                        | <i>HEMGN</i>                   | 0.19                |
| 211658_at   | peroxiredoxin 2                                                                                | <i>PRDX2</i>                   | 0.41                |
| 39729_at    | peroxiredoxin 2                                                                                | <i>PRDX2</i>                   | 0.15                |
| 205268_s_at | adducin 2 (beta)                                                                               | <i>ADD2</i>                    | 0.30                |
| 203116_s_at | ferrochelatase (protoporphyrin)                                                                | <i>FECH</i>                    | 0.41                |
| 210504_at   | Kruppel-like factor 1 (erythroid)                                                              | <i>KLF1</i>                    | 0.32                |
| 239142_at   | LOC317671                                                                                      | <i>LOC317671</i>               | 0.32                |
| 206698_at   | X-linked Kx blood group (McLeod syndrome)                                                      | <i>XK</i>                      | 0.19                |
| 221932_s_at | glutaredoxin 5 homolog ( <i>S. cerevisiae</i> )                                                | <i>GLRX5</i>                   | 0.53                |
| 218883_s_at | MLF1 interacting protein                                                                       | <i>MLF1IP</i>                  | 0.46                |
| 202078_at   | COP9 constitutive photomorphogenic homolog subunit 3 ( <i>Arabidopsis</i> )                    | <i>COPS3</i>                   | 0.68                |
| 212973_at   | ribose 5-phosphate isomerase A (ribose 5-phosphate epimerase)                                  | <i>RPIA</i>                    | 0.66                |
| 225051_at   | erythrocyte membrane protein band 4.1 (elliptocytosis 1, RH-linked)                            | <i>EPB41</i>                   | 0.55                |
| 209273_s_at | HESB like domain containing 2                                                                  | <i>HBLD2</i>                   | 0.58                |
| 209274_s_at | HESB like domain containing 2                                                                  | <i>HBLD2</i>                   | 0.53                |
| 222666_s_at | RNA terminal phosphate cyclase-like 1                                                          | <i>RCLI</i>                    | 0.52                |
| 205632_s_at | phosphatidylinositol-4-phosphate 5-kinase, type I, beta                                        | <i>PIP5K1B</i>                 | 0.30                |
| 218544_s_at | RNA terminal phosphate cyclase-like 1                                                          | <i>RCLI</i>                    | 0.62                |
| 202947_s_at | glycophorin C (Gerbich blood group)                                                            | <i>GYP C</i>                   | 0.30                |
| 237194_at   | Tetraspanin 5                                                                                  | <i>TSPAN5</i>                  | 0.48                |
| 212739_s_at | non-metastatic cells 4, protein expressed in                                                   | <i>NME4</i>                    | 0.59                |
| 228378_at   | chromosome 12 open reading frame 29                                                            | <i>C12orf29</i>                | 0.57                |
| 207112_s_at | GRB2-associated binding protein 1                                                              | <i>GAB1</i>                    | 0.69                |

|              |                                                                                                                  |                                       |      |
|--------------|------------------------------------------------------------------------------------------------------------------|---------------------------------------|------|
| 225998_at    | GRB2-associated binding protein 1                                                                                | <i>GABI</i>                           | 0.62 |
| 236379_at    | Erythrocyte membrane protein band 4.1 (elliptocytosis 1, RH-linked)                                              | <i>EPB41</i>                          | 0.60 |
| 1554423_a_at | F-box protein 7                                                                                                  | <i>FBXO7</i>                          | 0.65 |
| 201178_at    | F-box protein 7                                                                                                  | <i>FBXO7</i>                          | 0.67 |
| 206077_at    | Kell blood group, metalloendopeptidase                                                                           | <i>KEL</i>                            | 0.36 |
| 208501_at    | growth factor independent 1B (potential regulator of CDKN1A, translocated in CML)                                | <i>GFI1B</i>                          | 0.36 |
| 1558942_at   | zinc finger protein 765                                                                                          | <i>ZNF765</i>                         | 0.71 |
| 208115_x_at  | chromosome 10 open reading frame 137                                                                             | <i>C10orf137</i>                      | 0.64 |
| 202968_s_at  | dual-specificity tyrosine-(Y)-phosphorylation regulated kinase 2                                                 | <i>DYRK2</i>                          | 0.68 |
| 202969_at    | MRNA; cDNA DKFZp667B0924 (from clone DKFZp667B0924)                                                              |                                       | 0.63 |
| 218236_s_at  | protein kinase D3                                                                                                | <i>PRKD3</i>                          | 0.39 |
| 222565_s_at  | protein kinase D3                                                                                                | <i>PRKD3</i>                          | 0.52 |
| 226990_at    | GPI-anchored membrane protein 1                                                                                  | <i>GPIAP1</i>                         | 0.65 |
| 211081_s_at  | mitogen-activated protein kinase kinase kinase 5                                                                 | <i>MAP4K5</i>                         | 0.64 |
| 208810_at    | DnaJ (Hsp40) homolog, subfamily B, member 6                                                                      | <i>DNAJB6</i>                         | 0.64 |
| 208811_s_at  | DnaJ (Hsp40) homolog, subfamily B, member 6                                                                      | <i>DNAJB6</i>                         | 0.65 |
| 220306_at    | family with sequence similarity 46, member C                                                                     | <i>FAM46C</i>                         | 0.43 |
| 223708_at    | C1q and tumor necrosis factor related protein 4                                                                  | <i>C1QTNF4</i>                        | 0.27 |
| 235061_at    | protein phosphatase 1K (PP2C domain containing)                                                                  | <i>PPM1K</i>                          | 0.53 |
| 205284_at    | KIAA0133                                                                                                         | <i>KIAA0133</i>                       | 0.64 |
| 222703_s_at  | yrdC domain containing (E. coli)                                                                                 | <i>YRDC</i>                           | 0.68 |
| 203795_s_at  | B-cell CLL/lymphoma 7A                                                                                           | <i>BCL7A</i>                          | 0.51 |
| 204244_s_at  | DBF4 homolog (S. cerevisiae)                                                                                     | <i>DBF4</i>                           | 0.61 |
| 235170_at    | zinc finger protein 92                                                                                           | <i>ZNF92</i>                          | 0.55 |
| 202919_at    | preimplantation protein 3                                                                                        | <i>PREI3</i>                          | 0.72 |
| 219198_at    | general transcription factor IIIC, polypeptide 4, 90kDa                                                          | <i>GTF3C4</i>                         | 0.67 |
| 218954_s_at  | BRF2, subunit of RNA polymerase III transcription initiation factor, BRF1-like                                   | <i>BRF2</i>                           | 0.72 |
| 221940_at    | RNA pseudouridylylase domain containing 2                                                                        | <i>RPUSD2</i>                         | 0.72 |
| 230274_s_at  | Nucleoporin 88kDa                                                                                                | <i>NUP88</i>                          | 0.63 |
| 1557954_at   | chromosome X open reading frame 15                                                                               | <i>CXorf15</i>                        | 0.64 |
| 227520_at    | chromosome X open reading frame 15                                                                               | <i>CXorf15</i>                        | 0.62 |
| 212060_at    | U2-associated SR140 protein                                                                                      | <i>SR140</i>                          | 0.69 |
| 243176_at    | CDNA FLJ30090 fis, clone BNGH41000015                                                                            |                                       | 0.68 |
| 221749_at    | YTH domain family, member 3                                                                                      | <i>YTHDF3</i>                         | 0.71 |
| 207941_s_at  | RNA binding motif protein 39                                                                                     | <i>RBM39</i>                          | 0.69 |
| 229428_at    | Poly (ADP-ribose) glycohydrolase                                                                                 | <i>PARG</i>                           | 0.66 |
| 202396_at    | transcription elongation regulator 1                                                                             | <i>TCERG1</i>                         | 0.70 |
| 206095_s_at  | FUS interacting protein (serine/arginine-rich) 1 /// similar to FUS interacting protein (serine-arginine rich) 1 | <i>FUSIP1</i> ///<br><i>LOC642558</i> | 0.69 |
| 221809_at    | RAN binding protein 10                                                                                           | <i>RANBP10</i>                        | 0.57 |
| 53987_at     | RAN binding protein 10                                                                                           | <i>RANBP10</i>                        | 0.58 |
| 202883_s_at  | protein phosphatase 2 (formerly 2A), regulatory subunit A (PR 65), beta isoform                                  | <i>PPP2R1B</i>                        | 0.63 |
| 213899_at    | methionyl aminopeptidase 2                                                                                       | <i>METAP2</i>                         | 0.56 |
| 227993_at    | methionyl aminopeptidase 2                                                                                       | <i>METAP2</i>                         | 0.59 |
| 230129_at    | chromosome 10 open reading frame 89                                                                              | <i>C10orf89</i>                       | 0.53 |
| 202353_s_at  | proteasome (prosome, macropain) 26S subunit, non-ATPase, 12                                                      | <i>PSMD12</i>                         | 0.57 |
| 212061_at    | U2-associated SR140 protein                                                                                      | <i>SR140</i>                          | 0.56 |
| 203358_s_at  | enhancer of zeste homolog 2 (Drosophila)                                                                         | <i>EZH2</i>                           | 0.60 |
| 1554251_at   | heterochromatin protein 1, binding protein 3                                                                     | <i>HP1BP3</i>                         | 0.62 |
| 221821_s_at  | chromosome 12 open reading frame 41                                                                              | <i>C12orf41</i>                       | 0.57 |
| 226370_at    | kelch-like 15 (Drosophila)                                                                                       | <i>KLHL15</i>                         | 0.57 |
| 204568_at    | KIAA0831                                                                                                         | <i>KIAA0831</i>                       | 0.63 |

|              |                                                                                                      |                                             |      |
|--------------|------------------------------------------------------------------------------------------------------|---------------------------------------------|------|
| 228380_at    | Transcribed locus, moderately similar to NP_689672.2 hypothetical protein MGC45438 [Homo sapiens]    |                                             | 0.67 |
| 210054_at    | chromosome 4 open reading frame 15                                                                   | <i>C4orf15</i>                              | 0.57 |
| 209056_s_at  | CDC5 cell division cycle 5-like ( <i>S. pombe</i> )                                                  | <i>CDC5L</i>                                | 0.72 |
| 213794_s_at  | neuroguidin, EIF4E binding protein                                                                   | <i>NGDN</i>                                 | 0.71 |
| 219212_at    | heat shock 70kDa protein 14                                                                          | <i>HSPA14</i>                               | 0.62 |
| 235037_at    | transmembrane protein 41A                                                                            | <i>TMEM41A</i>                              | 0.65 |
| 225455_at    | transcriptional adaptor 1 (HFI1 homolog, yeast)-like                                                 | <i>TADA1L</i>                               | 0.62 |
| 218127_at    | nuclear transcription factor Y, beta                                                                 | <i>NFYB</i>                                 | 0.62 |
| 218128_at    | nuclear transcription factor Y, beta                                                                 | <i>NFYB</i>                                 | 0.63 |
| 225906_at    | CDNA FLJ38264 fis, clone FCBBF3001657                                                                |                                             | 0.70 |
| 209139_s_at  | protein kinase, interferon-inducible double stranded RNA dependent activator                         | <i>PRKRA</i>                                | 0.72 |
| 228605_at    | CDNA FLJ30010 fis, clone 3NB692000154                                                                |                                             | 0.52 |
| 221735_at    | WD repeat domain 48                                                                                  | <i>WDR48</i>                                | 0.57 |
| 222157_s_at  | WD repeat domain 48                                                                                  | <i>WDR48</i>                                | 0.56 |
| 65591_at     | WD repeat domain 48                                                                                  | <i>WDR48</i>                                | 0.66 |
| 226687_at    | PRP40 pre-mRNA processing factor 40 homolog A (yeast)                                                | <i>PRPF40A</i>                              | 0.60 |
| 236477_at    | PRP40 pre-mRNA processing factor 40 homolog A (yeast)                                                | <i>PRPF40A</i>                              | 0.65 |
| 202268_s_at  | amyloid beta precursor protein binding protein 1                                                     | <i>APPBP1</i>                               | 0.72 |
| 244103_at    | chromosome 1 open reading frame 55                                                                   | <i>C1orf55</i>                              | 0.59 |
| 208051_s_at  | poly(A) binding protein interacting protein 1                                                        | <i>PAIP1</i>                                | 0.44 |
| 209064_x_at  | poly(A) binding protein interacting protein 1                                                        | <i>PAIP1</i>                                | 0.45 |
| 222623_s_at  | zinc finger protein 639                                                                              | <i>ZNF639</i>                               | 0.58 |
| 222624_s_at  | zinc finger protein 639                                                                              | <i>ZNF639</i>                               | 0.54 |
| 209711_at    | solute carrier family 35 (UDP-glucuronic acid/UDP-N-acetylgalactosamine dual transporter), member D1 | <i>SLC35D1</i>                              | 0.56 |
| 212030_at    | RNA binding motif protein 25                                                                         | <i>RBM25</i>                                | 0.65 |
| 202560_s_at  | chromosome 1 open reading frame 77                                                                   | <i>C1orf77</i>                              | 0.70 |
| 221158_at    | chromosome 21 open reading frame 66                                                                  | <i>C21orf66</i>                             | 0.69 |
| 204951_at    | ras homolog gene family, member H                                                                    | <i>RHOH</i>                                 | 0.36 |
| 204752_x_at  | poly (ADP-ribose) polymerase family, member 2                                                        | <i>PARP2</i>                                | 0.68 |
| 215773_x_at  | poly (ADP-ribose) polymerase family, member 2                                                        | <i>PARP2</i>                                | 0.69 |
| 221517_s_at  | cofactor required for Sp1 transcriptional activation, subunit 6, 77kDa                               | <i>CRSP6</i>                                | 0.55 |
| 223297_at    | hypothetical protein MGC4268                                                                         | <i>MGC4268</i>                              | 0.62 |
| 1556060_a_at | KIAA1702 protein                                                                                     | <i>KIAA1702</i>                             | 0.57 |
| 222430_s_at  | YTH domain family, member 2                                                                          | <i>YTHDF2</i>                               | 0.68 |
| 230588_s_at  | hypothetical protein LOC285074 /// similar to anaphase promoting complex subunit 1                   | <i>LOC285074</i><br>///<br><i>LOC653663</i> | 0.70 |
| 230479_at    | Transcribed locus                                                                                    |                                             | 0.57 |
| 240222_at    | COP9 constitutive photomorphogenic homolog subunit 8 ( <i>Arabidopsis</i> )                          | <i>COPS8</i>                                | 0.68 |
| 202230_s_at  | calcium homeostasis endoplasmic reticulum protein                                                    | <i>CHERP</i>                                | 0.71 |
| 229594_at    | SPT2, Suppressor of Ty, domain containing 1 ( <i>S. cerevisiae</i> )                                 | <i>SPTY2D1</i>                              | 0.61 |
| 217804_s_at  | interleukin enhancer binding factor 3, 90kDa                                                         | <i>ILF3</i>                                 | 0.73 |
| 226572_at    | Suppressor of cytokine signaling 7                                                                   | <i>SOCS7</i>                                | 0.72 |
| 225157_at    | MLX interacting protein                                                                              | <i>MLXIP</i>                                | 0.68 |
| 244304_at    | hypothetical protein MGC42174                                                                        | <i>MGC42174</i>                             | 0.58 |
| 211375_s_at  | interleukin enhancer binding factor 3, 90kDa                                                         | <i>ILF3</i>                                 | 0.70 |
| 244092_at    | zinc finger, RAN-binding domain containing 3                                                         | <i>ZRANB3</i>                               | 0.68 |
| 223005_s_at  | chromosome 9 open reading frame 5                                                                    | <i>C9orf5</i>                               | 0.69 |
| 217830_s_at  | NSFL1 (p97) cofactor (p47)                                                                           | <i>NSFL1C</i>                               | 0.69 |
| 216226_at    | TAF4b RNA polymerase II, TATA box binding protein (TBP)-associated factor, 105kDa                    | <i>TAF4B</i>                                | 0.58 |

|             |                                                                                             |                                      |      |
|-------------|---------------------------------------------------------------------------------------------|--------------------------------------|------|
| 235020_at   | TAF4b RNA polymerase II, TATA box binding protein (TBP)-associated factor, 105kDa           | <i>TAF4B</i>                         | 0.45 |
| 219037_at   | CGI-115 protein                                                                             | <i>CGI-115</i>                       | 0.56 |
| 205135_s_at | nuclear fragile X mental retardation protein interacting protein 1                          | <i>NUFIP1</i>                        | 0.58 |
| 217961_at   | hypothetical protein FLJ20551                                                               | <i>FLJ20551</i>                      | 0.56 |
| 200993_at   | importin 7                                                                                  | <i>IPO7</i>                          | 0.65 |
| 200995_at   | Importin 7                                                                                  | <i>IPO7</i>                          | 0.54 |
| 222404_x_at | protein tyrosine phosphatase-like A domain containing 1                                     | <i>PTPLAD1</i>                       | 0.54 |
| 217777_s_at | protein tyrosine phosphatase-like A domain containing 1                                     | <i>PTPLAD1</i>                       | 0.52 |
| 222405_at   | similar to butyrate-induced transcript 1                                                    | <i>LOC652500</i>                     | 0.60 |
| 200052_s_at | interleukin enhancer binding factor 2, 45kDa                                                | <i>ILF2</i>                          | 0.69 |
| 201946_s_at | chaperonin containing TCP1, subunit 2 (beta)                                                | <i>CCT2</i>                          | 0.59 |
| 201947_s_at | chaperonin containing TCP1, subunit 2 (beta)                                                | <i>CCT2</i>                          | 0.61 |
| 229256_at   | phosphoglucomutase 2-like 1                                                                 | <i>PGM2L1</i>                        | 0.48 |
| 218756_s_at | short-chain dehydrogenase/reductase                                                         | <i>MGC4172</i>                       | 0.48 |
| 209826_at   | EGF-like-domain, multiple 8 /// similar to palmitoyl-protein thioesterase 2                 | <i>EGFL8 ///</i><br><i>LOC653870</i> | 0.48 |
| 210473_s_at | G protein-coupled receptor 125                                                              | <i>GPR125</i>                        | 0.33 |
| 213730_x_at | transcription factor 3 (E2A immunoglobulin enhancer binding factors E12/E47)                | <i>TCF3</i>                          | 0.66 |
| 210776_x_at | transcription factor 3 (E2A immunoglobulin enhancer binding factors E12/E47)                | <i>TCF3</i>                          | 0.61 |
| 213811_x_at | transcription factor 3 (E2A immunoglobulin enhancer binding factors E12/E47)                | <i>TCF3</i>                          | 0.64 |
| 239794_at   | Isoleucine-tRNA synthetase                                                                  | <i>IARS</i>                          | 0.59 |
| 220607_x_at | TH1-like (Drosophila)                                                                       | <i>TH1L</i>                          | 0.70 |
| 225261_x_at | TH1-like (Drosophila)                                                                       | <i>TH1L</i>                          | 0.70 |
| 225006_x_at | TH1-like (Drosophila)                                                                       | <i>TH1L</i>                          | 0.70 |
| 225865_x_at | TH1-like (Drosophila)                                                                       | <i>TH1L</i>                          | 0.69 |
| 201919_at   | Solute carrier family 25, member 36                                                         | <i>SLC25A36</i>                      | 0.73 |
| 212348_s_at | amine oxidase (flavin containing) domain 2                                                  | <i>AOF2</i>                          | 0.69 |
| 218192_at   | inositol hexaphosphate kinase 2                                                             | <i>IHPK2</i>                         | 0.58 |
| 47083_at    | chromosome 7 open reading frame 26                                                          | <i>C7orf26</i>                       | 0.74 |
| 223742_at   | mitochondrial ribosomal protein L4                                                          | <i>MRPL4</i>                         | 0.72 |
| 207515_s_at | polymerase (RNA) I polypeptide C, 30kDa                                                     | <i>POLR1C</i>                        | 0.63 |
| 209317_at   | polymerase (RNA) I polypeptide C, 30kDa                                                     | <i>POLR1C</i>                        | 0.59 |
| 227617_at   | hypothetical protein LOC199953                                                              | <i>RP13-15M17.2</i>                  | 0.64 |
| 225857_s_at | hypothetical LOC388796                                                                      | <i>LOC388796</i>                     | 0.61 |
| 65588_at    | hypothetical LOC388796                                                                      | <i>LOC388796</i>                     | 0.61 |
| 206341_at   | interleukin 2 receptor, alpha                                                               | <i>IL2RA</i>                         | 1.39 |
| 224065_at   | homeodomain interacting protein kinase 2                                                    | <i>HIPK2</i>                         | 1.40 |
| 242956_at   | Isocitrate dehydrogenase 1 (NADP+), soluble                                                 | <i>IDH1</i>                          | 1.49 |
| 1562321_at  | pyruvate dehydrogenase kinase, isozyme 4                                                    | <i>PDK4</i>                          | 1.55 |
| 210128_s_at | leukotriene B4 receptor                                                                     | <i>LTB4R</i>                         | 1.39 |
| 216176_at   | hepatocellular carcinoma-related HCRP1                                                      | <i>HCRP1</i>                         | 1.90 |
| 240265_at   | TRAF3 interacting protein 3                                                                 | <i>TRAF3IP3</i>                      | 2.00 |
| 228968_at   | zinc finger protein 449                                                                     | <i>ZNF449</i>                        | 1.43 |
| 1555317_at  | polymerase (DNA directed) kappa                                                             | <i>POLK</i>                          | 1.87 |
| 233122_at   | Keratinocyte associated protein 2 /// MRNA; cDNA DKFZp686L09144 (from clone DKFZp686L09144) | <i>KRTCAP2</i>                       | 1.79 |
| 205745_x_at | ADAM metallopeptidase domain 17 (tumor necrosis factor, alpha, converting enzyme)           | <i>ADAM17</i>                        | 1.58 |
| 205746_s_at | ADAM metallopeptidase domain 17 (tumor necrosis factor, alpha, converting enzyme)           | <i>ADAM17</i>                        | 1.90 |
| 217416_x_at |                                                                                             |                                      | 1.50 |

|              |                                                                                                                                                                                                                                                   |                                                                                                        |      |
|--------------|---------------------------------------------------------------------------------------------------------------------------------------------------------------------------------------------------------------------------------------------------|--------------------------------------------------------------------------------------------------------|------|
| 212587_s_at  | protein tyrosine phosphatase, receptor type, C                                                                                                                                                                                                    | <i>PTPRC</i>                                                                                           | 1.79 |
| 218501_at    | Rho guanine nucleotide exchange factor (GEF) 3                                                                                                                                                                                                    | <i>ARHGEF3</i>                                                                                         | 2.32 |
| 222799_at    | HSPC049 protein                                                                                                                                                                                                                                   | <i>HSPC049</i>                                                                                         | 1.43 |
| 1552690_a_at | calcium channel, voltage-dependent, alpha 2/delta subunit 4                                                                                                                                                                                       | <i>CACNA2D4</i>                                                                                        | 3.58 |
| 228083_at    | calcium channel, voltage-dependent, alpha 2/delta subunit 4                                                                                                                                                                                       | <i>CACNA2D4</i>                                                                                        | 4.64 |
| 224825_at    | deoxynucleotidyltransferase, terminal, interacting protein 1                                                                                                                                                                                      | <i>DNTTIP1</i>                                                                                         | 1.41 |
| 234942_s_at  | deoxynucleotidyltransferase, terminal, interacting protein 1                                                                                                                                                                                      | <i>DNTTIP1</i>                                                                                         | 1.64 |
| 217852_s_at  | ADP-ribosylation factor-like 8B                                                                                                                                                                                                                   | <i>ARL8B</i>                                                                                           | 1.76 |
| 222442_s_at  | ADP-ribosylation factor-like 8B                                                                                                                                                                                                                   | <i>ARL8B</i>                                                                                           | 1.80 |
| 207643_s_at  | tumor necrosis factor receptor superfamily, member 1A                                                                                                                                                                                             | <i>TNFRSF1A</i>                                                                                        | 2.05 |
| 221041_s_at  | solute carrier family 17 (anion/sugar transporter), member 5                                                                                                                                                                                      | <i>SLC17A5</i>                                                                                         | 1.76 |
| 227954_at    | hypothetical protein LOC162073                                                                                                                                                                                                                    | <i>LOC162073</i>                                                                                       | 1.49 |
| 201389_at    | integrin, alpha 5 (fibronectin receptor, alpha polypeptide)                                                                                                                                                                                       | <i>ITGA5</i>                                                                                           | 1.90 |
| 241464_s_at  | FLJ27365 protein                                                                                                                                                                                                                                  | <i>FLJ27365</i>                                                                                        | 2.32 |
| 205366_s_at  | homeobox B6                                                                                                                                                                                                                                       | <i>HOXB6</i>                                                                                           | 4.34 |
| 205601_s_at  | homeobox B5                                                                                                                                                                                                                                       | <i>HOXB5</i>                                                                                           | 1.83 |
| 205179_s_at  | ADAM metallopeptidase domain 8                                                                                                                                                                                                                    | <i>ADAM8</i>                                                                                           | 2.32 |
| 214121_x_at  | PDZ and LIM domain 7 (enigma)                                                                                                                                                                                                                     | <i>PDLIM7</i>                                                                                          | 1.43 |
| 205774_at    | coagulation factor XII (Hageman factor)                                                                                                                                                                                                           | <i>F12</i>                                                                                             | 2.03 |
| 226306_at    | chromosome 6 open reading frame 1                                                                                                                                                                                                                 | <i>C6orf1</i>                                                                                          | 1.46 |
| 1562608_at   | Transmembrane protein 144                                                                                                                                                                                                                         | <i>TMEM144</i>                                                                                         | 1.62 |
| 213375_s_at  | hypothetical gene CG018                                                                                                                                                                                                                           | <i>CG018</i>                                                                                           | 1.67 |
| 214906_x_at  | hypothetical gene CG018                                                                                                                                                                                                                           | <i>CG018</i>                                                                                           | 1.45 |
| 217197_x_at  | hypothetical gene CG018                                                                                                                                                                                                                           | <i>CG018</i>                                                                                           | 1.60 |
| 1567559_s_at | triggering receptor expressed on myeloid cells-like 4 /// triggering receptor expressed on myeloid cells-like 3                                                                                                                                   | <i>TREML4</i> ///<br><i>TREML3</i>                                                                     | 1.57 |
| 242871_at    | progesterone and adiponectin receptor family member V                                                                                                                                                                                             | <i>PAQR5</i>                                                                                           | 1.38 |
| 214681_at    | glycerol kinase                                                                                                                                                                                                                                   | <i>GK</i>                                                                                              | 1.57 |
| 237264_at    | Ring finger protein 13                                                                                                                                                                                                                            | <i>RNF13</i>                                                                                           | 1.47 |
| 202357_s_at  | complement factor B                                                                                                                                                                                                                               | <i>CFB</i>                                                                                             | 1.38 |
| 228923_at    | S100 calcium binding protein A6 (calcyclin)                                                                                                                                                                                                       | <i>S100A6</i>                                                                                          | 1.88 |
| 1560011_at   | prostate stem cell antigen                                                                                                                                                                                                                        | <i>PSCA</i>                                                                                            | 2.01 |
| 214195_at    | tripeptidyl peptidase I                                                                                                                                                                                                                           | <i>TPPI</i>                                                                                            | 1.57 |
| 215151_at    | dedicator of cytokinesis 10                                                                                                                                                                                                                       | <i>DOCK10</i>                                                                                          | 1.68 |
| 240392_at    | Caspase recruitment domain family, member 14                                                                                                                                                                                                      | <i>CARD14</i>                                                                                          | 2.23 |
| 202625_at    | v-src tyrosine kinase viral related oncogene homolog                                                                                                                                                                                              | <i>LYN</i>                                                                                             | 1.82 |
| 202626_s_at  | v-src tyrosine kinase viral related oncogene homolog                                                                                                                                                                                              | <i>LYN</i>                                                                                             | 1.69 |
| 212119_at    | ras homolog gene family, member Q                                                                                                                                                                                                                 | <i>RHOQ</i>                                                                                            | 1.67 |
| 212120_at    | hypothetical LOC284988                                                                                                                                                                                                                            | <i>LOC284988</i>                                                                                       | 1.84 |
| 212117_at    | ras homolog gene family, member Q                                                                                                                                                                                                                 | <i>RHOQ</i>                                                                                            | 1.58 |
| 214449_s_at  | ras homolog gene family, member Q                                                                                                                                                                                                                 | <i>RHOQ</i>                                                                                            | 1.64 |
| 1554503_a_at | osteoclast-associated receptor                                                                                                                                                                                                                    | <i>OSCAR</i>                                                                                           | 2.92 |
| 203912_s_at  | deoxyribonuclease I-like 1                                                                                                                                                                                                                        | <i>DNASE1L1</i>                                                                                        | 1.43 |
| 219104_at    | ring finger protein 141                                                                                                                                                                                                                           | <i>RNF141</i>                                                                                          | 1.56 |
| 230361_at    | hypothetical protein KIAA1833                                                                                                                                                                                                                     | <i>KIAA1833</i>                                                                                        | 1.72 |
| 211416_x_at  | gamma-glutamyltransferase-like activity 4                                                                                                                                                                                                         | <i>GGTLA4</i>                                                                                          | 1.49 |
| 215603_x_at  | gamma-glutamyltransferase 1 /// gamma-glutamyltransferase 2 /// gamma-glutamyltransferase-like 4 /// similar to gamma-glutamyltransferase 2 /// similar to Gamma-glutamyltranspeptidase 1 precursor (Gamma-glutamyltransferase 1) (CD224 antigen) | <i>GGT1</i> ///<br><i>GGT2</i> ///<br><i>GGTLA4</i> ///<br><i>LOC643009</i><br>///<br><i>LOC653257</i> | 1.56 |
| 208284_x_at  | gamma-glutamyltransferase 1                                                                                                                                                                                                                       | <i>GGT1</i>                                                                                            | 1.75 |

|              |                                                                                                                                    |                                      |      |
|--------------|------------------------------------------------------------------------------------------------------------------------------------|--------------------------------------|------|
| 211417_x_at  | gamma-glutamyltransferase 1                                                                                                        | <i>GGT1</i>                          | 1.76 |
| 207131_x_at  | gamma-glutamyltransferase 1                                                                                                        | <i>GGT1</i>                          | 1.87 |
| 209919_x_at  | gamma-glutamyltransferase 1                                                                                                        | <i>GGT1</i>                          | 1.90 |
| 218700_s_at  | RAB7, member RAS oncogene family-like 1                                                                                            | <i>RAB7L1</i>                        | 1.91 |
| 226074_at    | protein phosphatase 1M (PP2C domain containing)                                                                                    | <i>PPM1M</i>                         | 1.67 |
| 206482_at    | PTK6 protein tyrosine kinase 6                                                                                                     | <i>PTK6</i>                          | 1.63 |
| 205180_s_at  | ADAM metalloproteinase domain 8                                                                                                    | <i>ADAM8</i>                         | 3.13 |
| 209906_at    | complement component 3a receptor 1                                                                                                 | <i>C3AR1</i>                         | 3.62 |
| 219434_at    | triggering receptor expressed on myeloid cells 1                                                                                   | <i>TREM1</i>                         | 4.87 |
| 204575_s_at  | matrix metalloproteinase 19 /// similar to Matrix metalloproteinase-19 precursor (MMP-19) (Matrix metalloproteinase RASI) (MMP-18) | <i>MMP19</i> ///<br><i>LOC652543</i> | 2.29 |
| 204043_at    | transcobalamin II; macrocytic anemia                                                                                               | <i>TCN2</i>                          | 1.64 |
| 204158_s_at  | T-cell, immune regulator 1, ATPase, H <sup>+</sup> transporting, lysosomal V0 subunit A3                                           | <i>TCIRG1</i>                        | 2.22 |
| 222173_s_at  | TBC1 domain family, member 2                                                                                                       | <i>TBC1D2</i>                        | 1.96 |
| 1554285_at   | hepatitis A virus cellular receptor 2                                                                                              | <i>HAVCR2</i>                        | 2.40 |
| 221641_s_at  | acyl-CoA thioesterase 9                                                                                                            | <i>ACOT9</i>                         | 1.65 |
| 212334_at    | glucosamine (N-acetyl)-6-sulfatase (Sanfilippo disease IIID)                                                                       | <i>GNS</i>                           | 2.68 |
| 212335_at    | glucosamine (N-acetyl)-6-sulfatase (Sanfilippo disease IIID)                                                                       | <i>GNS</i>                           | 2.97 |
| 200766_at    | cathepsin D (lysosomal aspartyl peptidase)                                                                                         | <i>CTSD</i>                          | 2.09 |
| 225372_at    | chromosome 10 open reading frame 54                                                                                                | <i>C10orf54</i>                      | 3.05 |
| 225373_at    | chromosome 10 open reading frame 54                                                                                                | <i>C10orf54</i>                      | 2.55 |
| 209370_s_at  | SH3-domain binding protein 2                                                                                                       | <i>SH3BP2</i>                        | 1.68 |
| 244654_at    | myosin IG                                                                                                                          | <i>MYO1G</i>                         | 2.43 |
| 224846_at    | SH3KBP1 binding protein 1                                                                                                          | <i>SHKBP1</i>                        | 1.55 |
| 211250_s_at  | SH3-domain binding protein 2                                                                                                       | <i>SH3BP2</i>                        | 1.66 |
| 212516_at    | centaurin, delta 2                                                                                                                 | <i>CENTD2</i>                        | 1.51 |
| 34206_at     | centaurin, delta 2                                                                                                                 | <i>CENTD2</i>                        | 1.77 |
| 201126_s_at  | mannosyl (alpha-1,3-)-glycoprotein beta-1,2-N-acetylglucosaminyltransferase                                                        | <i>MGAT1</i>                         | 1.66 |
| 210184_at    | integrin, alpha X (complement component 3 receptor 4 subunit)                                                                      | <i>ITGAX</i>                         | 2.91 |
| 211286_x_at  | colony stimulating factor 2 receptor, alpha, low-affinity (granulocyte-macrophage)                                                 | <i>CSF2RA</i>                        | 2.08 |
| 222483_at    | EF-hand domain family, member D2                                                                                                   | <i>EFHD2</i>                         | 1.84 |
| 205922_at    | vanin 2                                                                                                                            | <i>VNN2</i>                          | 3.67 |
| 217507_at    | solute carrier family 11 (proton-coupled divalent metal ion transporters), member 1                                                | <i>SLC11A1</i>                       | 2.32 |
| 1555116_s_at | solute carrier family 11 (proton-coupled divalent metal ion transporters), member 1                                                | <i>SLC11A1</i>                       | 2.02 |
| 210423_s_at  | solute carrier family 11 (proton-coupled divalent metal ion transporters), member 1                                                | <i>SLC11A1</i>                       | 2.71 |
| 210422_x_at  | solute carrier family 11 (proton-coupled divalent metal ion transporters), member 1                                                | <i>SLC11A1</i>                       | 1.87 |
| 217473_x_at  | solute carrier family 11 (proton-coupled divalent metal ion transporters), member 1                                                | <i>SLC11A1</i>                       | 1.75 |
| 1554175_at   | CD300 molecule-like family member b                                                                                                | <i>CD300LB</i>                       | 2.45 |
| 228762_at    | lunatic fringe homolog (Drosophila)                                                                                                | <i>LFNG</i>                          | 2.09 |
| 1556747_a_at | CDNA FLJ39784 fis, clone SPLEN2002314                                                                                              |                                      | 1.69 |
| 207270_x_at  | CD300c molecule                                                                                                                    | <i>CD300C</i>                        | 2.12 |
| 212948_at    | calmodulin binding transcription activator 2                                                                                       | <i>CAMTA2</i>                        | 1.57 |
| 231099_at    | Solute carrier family 31 (copper transporters), member 2                                                                           | <i>SLC31A2</i>                       | 1.68 |
| 216322_at    | CD58 molecule                                                                                                                      | <i>CD58</i>                          | 1.73 |
| 211776_s_at  | erythrocyte membrane protein band 4.1-like 3                                                                                       | <i>EPB41L3</i>                       | 3.76 |
| 212681_at    | erythrocyte membrane protein band 4.1-like 3                                                                                       | <i>EPB41L3</i>                       | 3.11 |
| 205781_at    | chromosome 16 open reading frame 7                                                                                                 | <i>C16orf7</i>                       | 1.50 |
| 206868_at    | START domain containing 8                                                                                                          | <i>STARD8</i>                        | 1.59 |
| 218821_at    | aminopeptidase-like 1                                                                                                              | <i>NPEPL1</i>                        | 1.58 |
| 220507_s_at  | ureidopropionase, beta                                                                                                             | <i>UPB1</i>                          | 2.81 |
| 209446_s_at  | chromosome 7 open reading frame 44                                                                                                 | <i>C7orf44</i>                       | 3.44 |
| 213700_s_at  | Pyruvate kinase, muscle                                                                                                            | <i>PKM2</i>                          | 2.95 |

|              |                                                                             |                 |      |
|--------------|-----------------------------------------------------------------------------|-----------------|------|
| 1568623_a_at | solute carrier family 35, member E4                                         | <i>SLC35E4</i>  | 1.61 |
| 202877_s_at  | CD93 molecule                                                               | <i>CD93</i>     | 2.87 |
| 240481_at    | TRAF3 interacting protein 3                                                 | <i>TRAF3IP3</i> | 1.75 |
| 206600_s_at  | solute carrier family 16, member 5 (monocarboxylic acid transporter 6)      | <i>SLC16A5</i>  | 1.72 |
| 213590_at    | solute carrier family 16, member 5 (monocarboxylic acid transporter 6)      | <i>SLC16A5</i>  | 1.62 |
| 206687_s_at  | protein tyrosine phosphatase, non-receptor type 6                           | <i>PTPN6</i>    | 2.26 |
| 223591_at    | ring finger protein 135                                                     | <i>RNF135</i>   | 1.84 |
| 223592_s_at  | ring finger protein 135                                                     | <i>RNF135</i>   | 1.91 |
| 1558549_s_at | vanin 1                                                                     | <i>VNN1</i>     | 3.64 |
| 205844_at    | vanin 1                                                                     | <i>VNN1</i>     | 8.73 |
| 204774_at    | ecotropic viral integration site 2A                                         | <i>EVI2A</i>    | 3.02 |
| 223686_at    | thiamin pyrophosphokinase 1                                                 | <i>TPK1</i>     | 1.85 |
| 228341_at    | CDNA FLJ34034 fis, clone FCBBF2004671                                       |                 | 1.63 |
| 200625_s_at  | CAP, adenylate cyclase-associated protein 1 (yeast)                         | <i>CAP1</i>     | 1.50 |
| 213798_s_at  | CAP, adenylate cyclase-associated protein 1 (yeast)                         | <i>CAP1</i>     | 1.51 |
| 238063_at    | transmembrane protein 154                                                   | <i>TMEM154</i>  | 1.92 |
| 209933_s_at  | CD300a molecule                                                             | <i>CD300A</i>   | 2.31 |
| 217078_s_at  | CD300a molecule                                                             | <i>CD300A</i>   | 2.18 |
| 217909_s_at  | MAX-like protein X                                                          | <i>MLX</i>      | 1.50 |
| 217910_x_at  | MAX-like protein X                                                          | <i>MLX</i>      | 1.40 |
| 210205_at    | UDP-Gal:betaGlcNAc beta 1,3-galactosyltransferase, polypeptide 4            | <i>B3GALT4</i>  | 1.39 |
| 202855_s_at  | solute carrier family 16, member 3 (monocarboxylic acid transporter 4)      | <i>SLC16A3</i>  | 2.33 |
| 202856_s_at  | solute carrier family 16, member 3 (monocarboxylic acid transporter 4)      | <i>SLC16A3</i>  | 2.68 |
| 206235_at    | ligase IV, DNA, ATP-dependent                                               | <i>LIG4</i>     | 1.58 |
| 227766_at    | ligase IV, DNA, ATP-dependent                                               | <i>LIG4</i>     | 1.86 |
| 212685_s_at  | transducin (beta)-like 2                                                    | <i>TBL2</i>     | 1.68 |
| 222127_s_at  | exocyst complex component 1                                                 | <i>EXOC1</i>    | 1.46 |
| 219620_x_at  | hypothetical protein FLJ20245                                               | <i>FLJ20245</i> | 1.51 |
| 223261_at    | polymerase (DNA directed) kappa                                             | <i>POLK</i>     | 1.45 |
| 203460_s_at  | presenilin 1 (Alzheimer disease 3)                                          | <i>PSEN1</i>    | 1.86 |
| 226577_at    | CDNA FLJ36867 fis, clone ASTRO2016491                                       |                 | 1.55 |
| 238816_at    | CDNA FLJ36867 fis, clone ASTRO2016491                                       |                 | 1.59 |
| 202422_s_at  | acyl-CoA synthetase long-chain family member 4                              | <i>ACSL4</i>    | 2.11 |
| 207545_s_at  | numb homolog (Drosophila)                                                   | <i>NUMB</i>     | 1.72 |
| 230462_at    | numb homolog (Drosophila)                                                   | <i>NUMB</i>     | 2.04 |
| 203278_s_at  | PHD finger protein 21A                                                      | <i>PHF21A</i>   | 1.43 |
| 230261_at    | ST8 alpha-N-acetyl-neuraminide alpha-2,8-sialyltransferase 4                | <i>ST8SIA4</i>  | 2.05 |
| 227098_at    | dual specificity phosphatase 18                                             | <i>DUSP18</i>   | 1.56 |
| 243969_at    | solute carrier family 24 (sodium/potassium/calcium exchanger), member 4     | <i>SLC24A4</i>  | 1.70 |
| 205277_at    | PR domain containing 2, with ZNF domain                                     | <i>PRDM2</i>    | 1.66 |
| 207122_x_at  | sulfotransferase family, cytosolic, 1A, phenol-preferring, member 2         | <i>SULT1A2</i>  | 1.37 |
| 227352_at    | chromosome 19 open reading frame 39                                         | <i>C19orf39</i> | 1.49 |
| 200761_s_at  | ADP-ribosylation-like factor 6 interacting protein 5                        | <i>ARL6IP5</i>  | 1.66 |
| 1569004_at   | Homo sapiens, Similar to neuronal thread protein, clone IMAGE:4106635, mRNA |                 | 1.68 |
| 242521_at    | Homo sapiens, Similar to neuronal thread protein, clone IMAGE:4106635, mRNA |                 | 1.81 |
