# Supplementary material
Source: PubMed Central journal article supplement (PMC2214747)

**A**

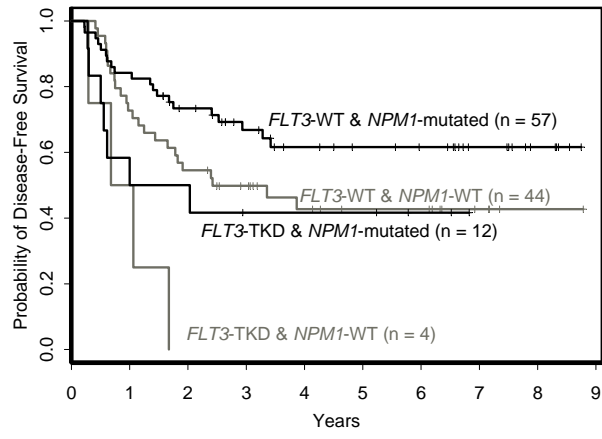

**B**

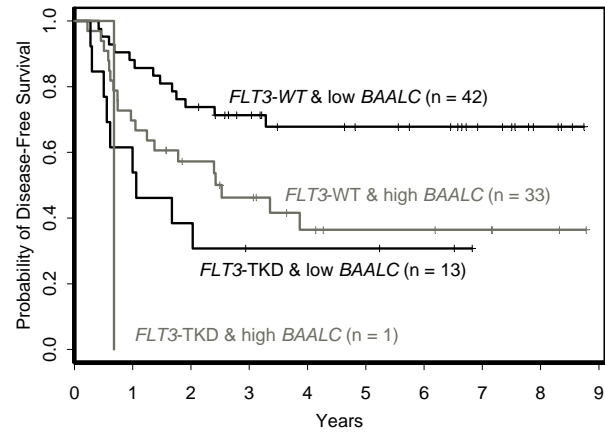

**C**

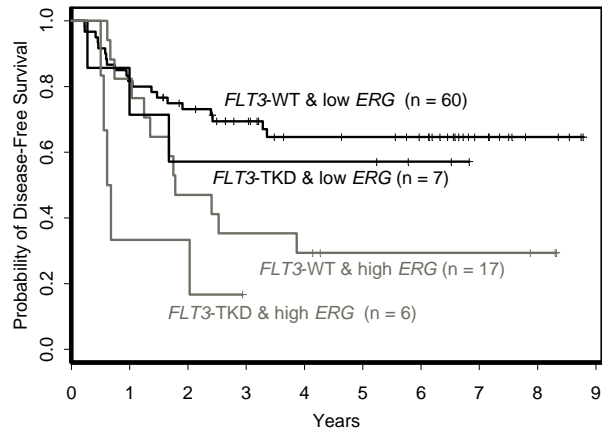

Supplement: blood_blood-2007-08-107946_4.pdf [file blood_blood-2007-08-107946_4.pdf]

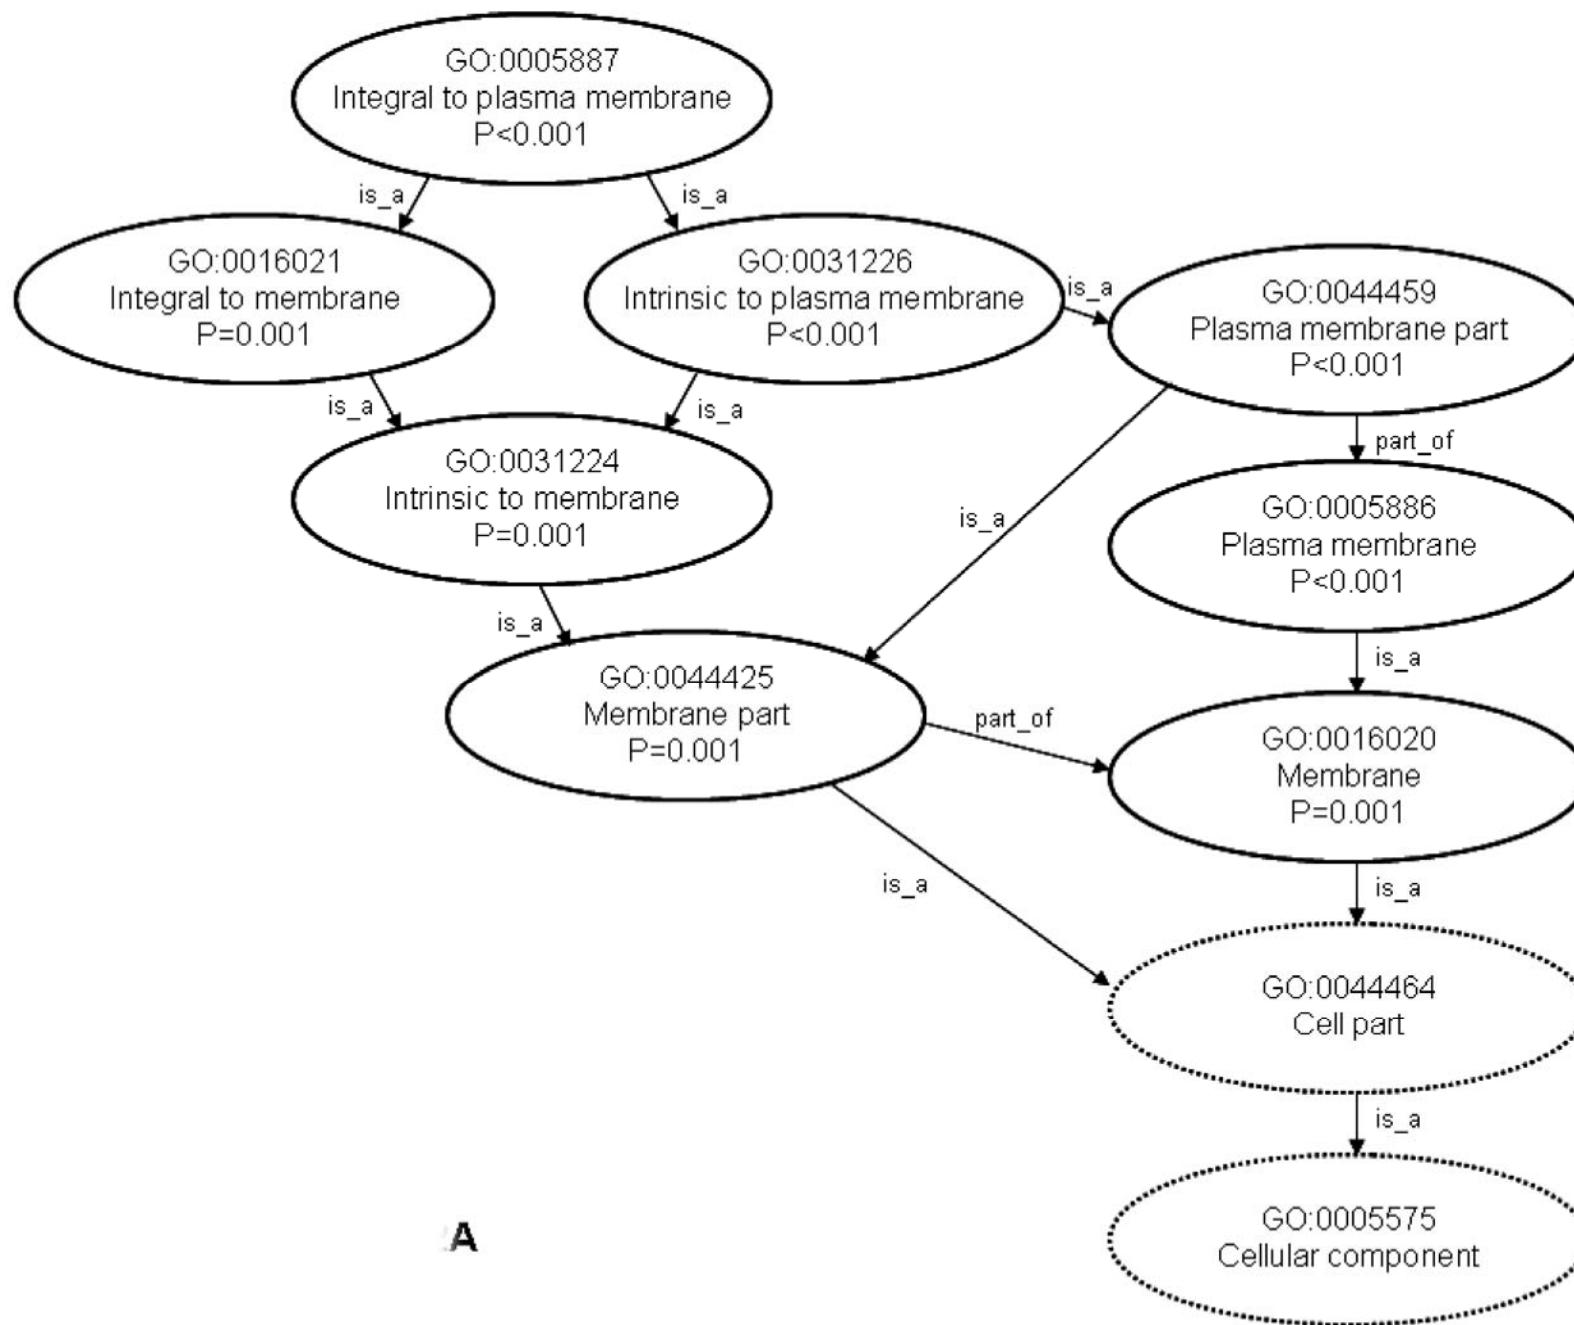

**A**

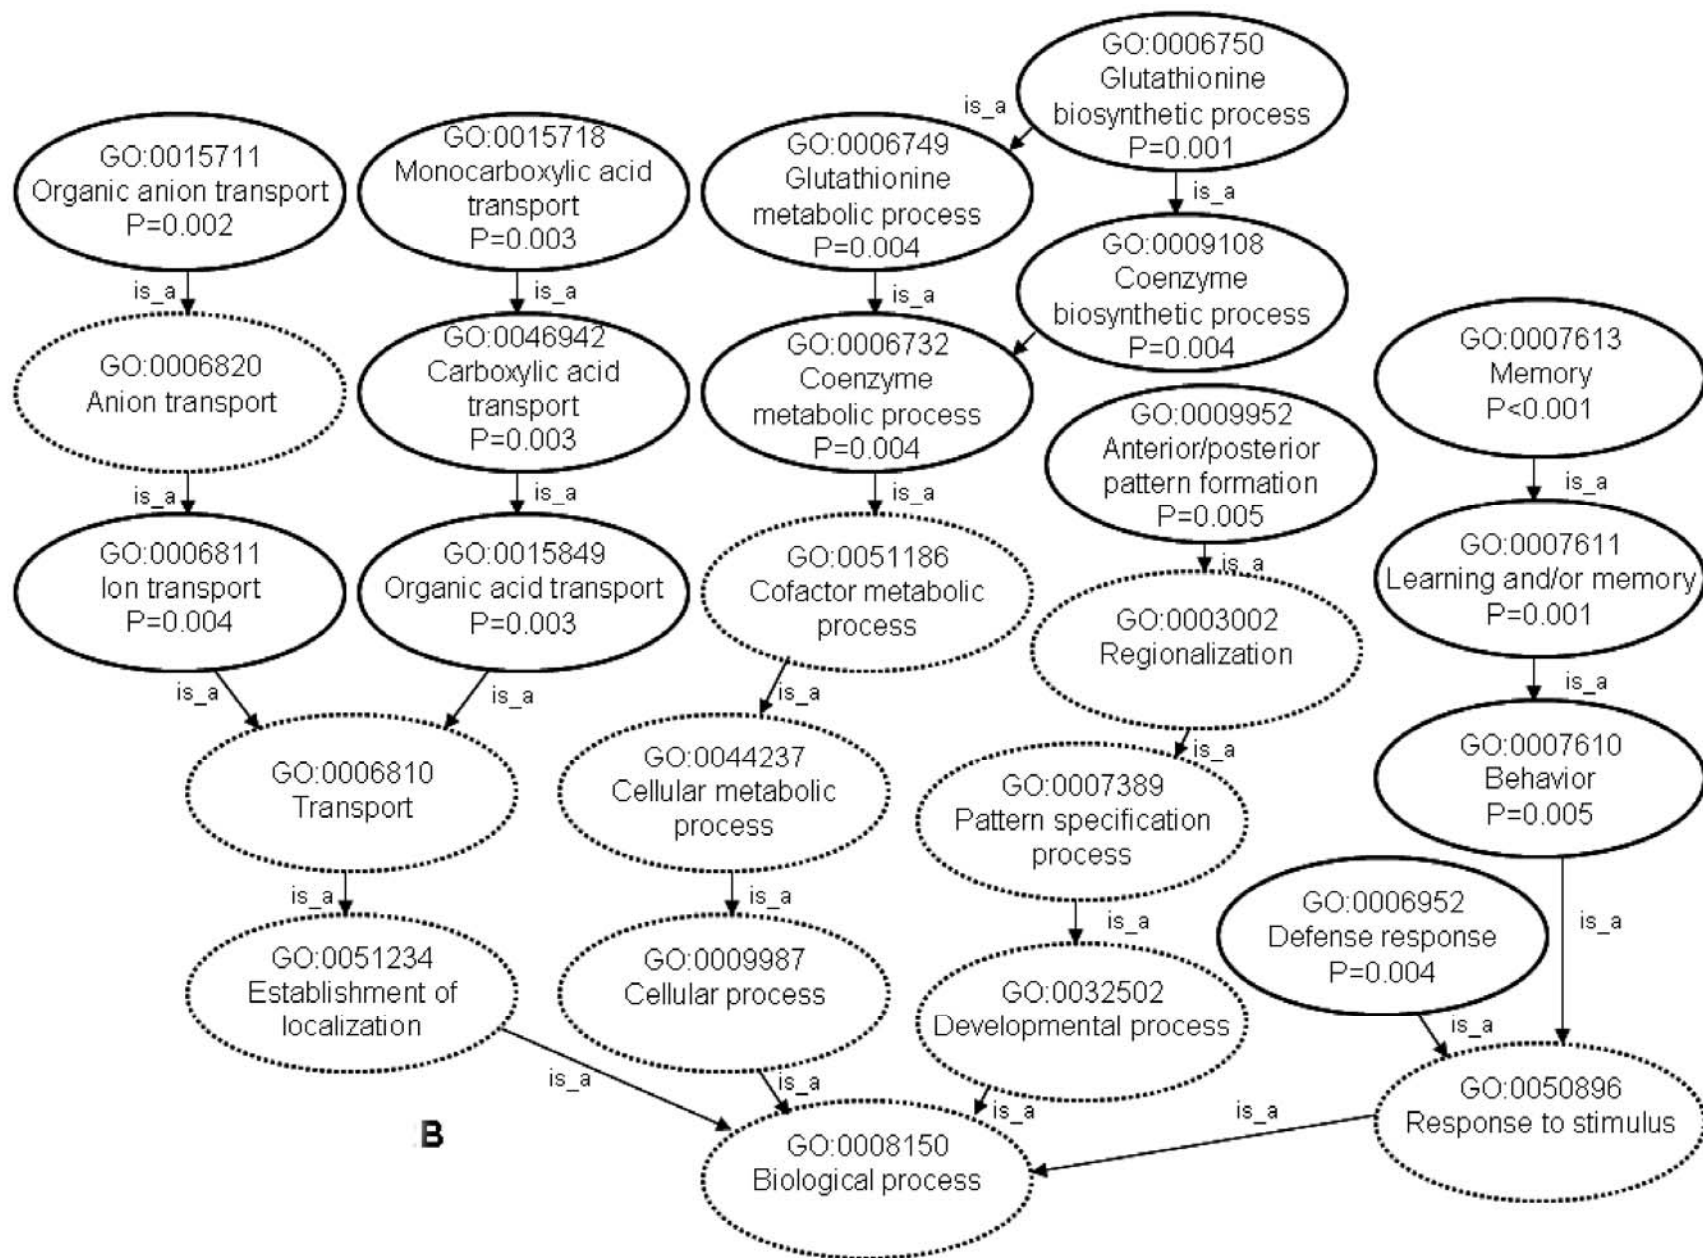

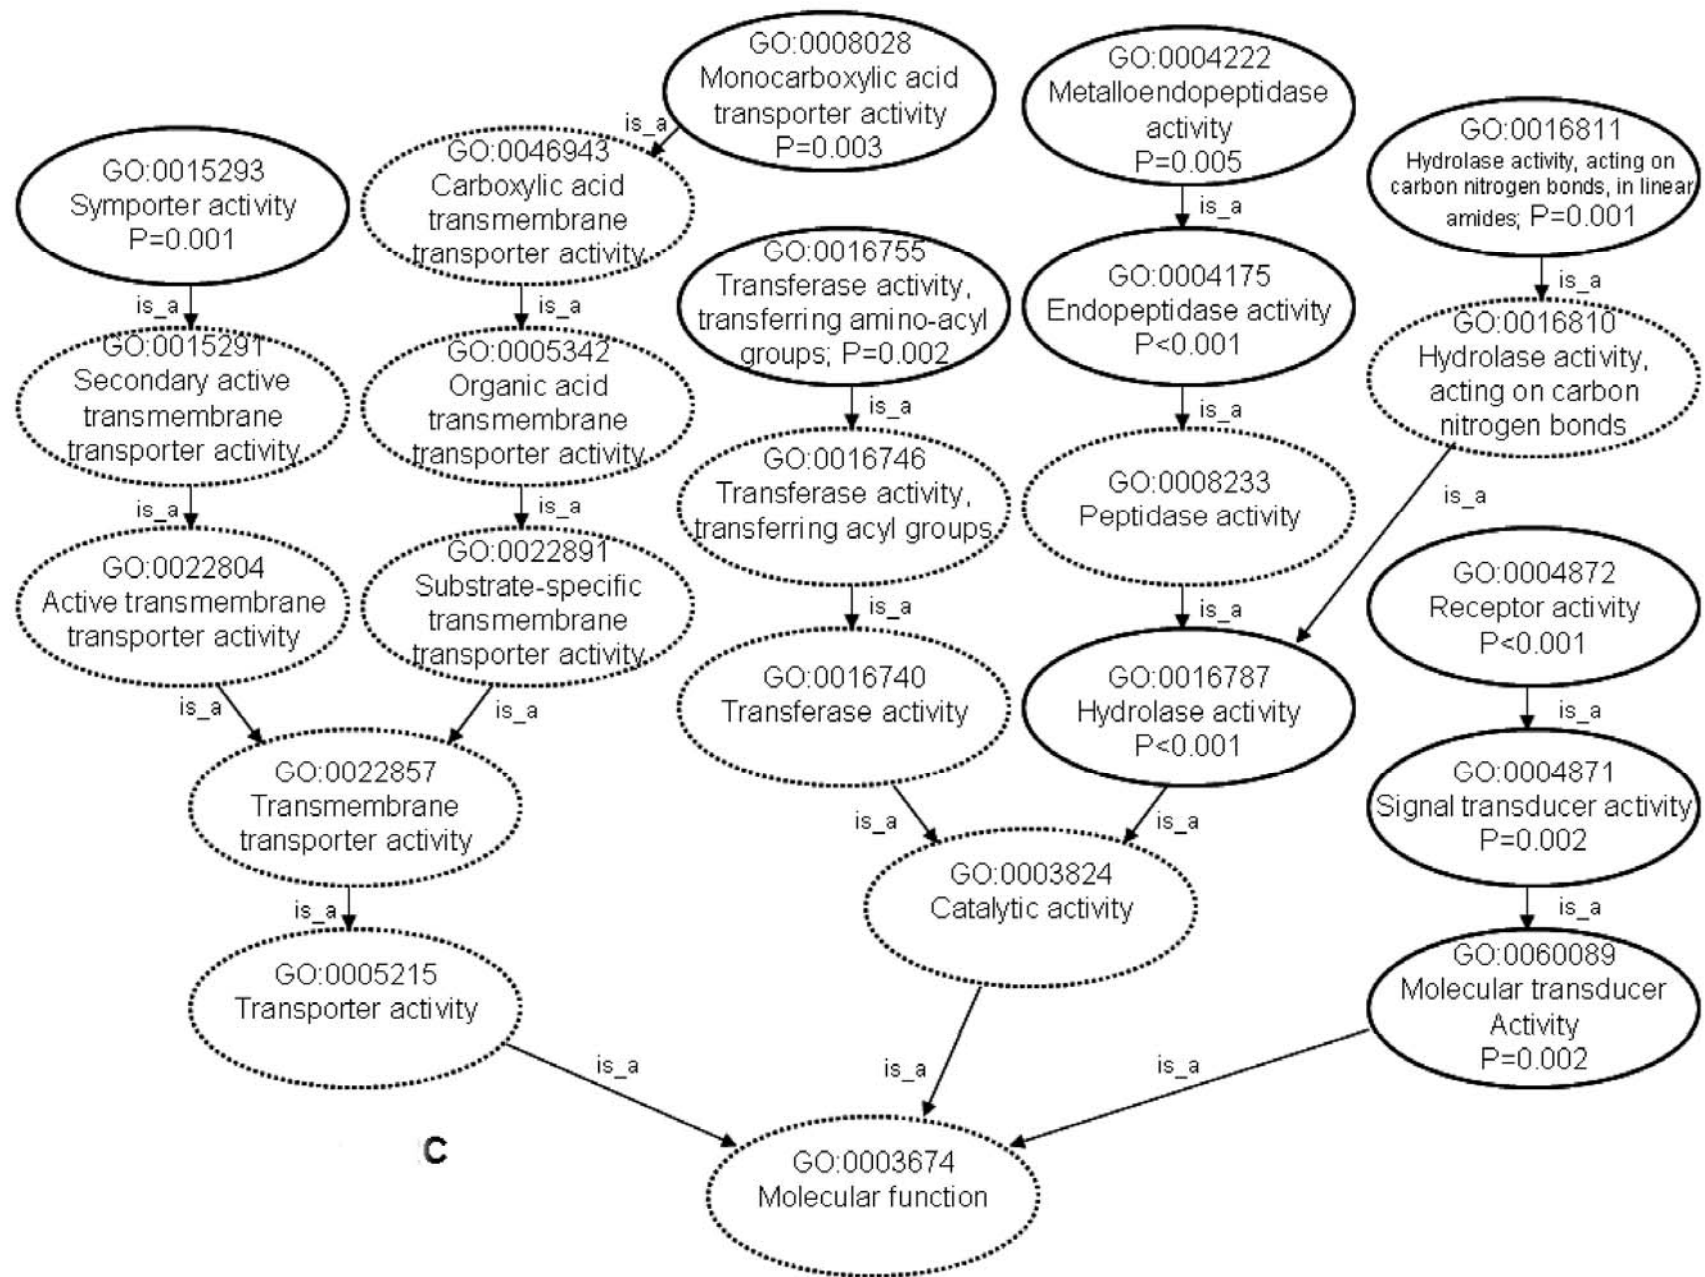

Supplement: blood_blood-2007-08-107946_5.pdf [file blood_blood-2007-08-107946_5.pdf]

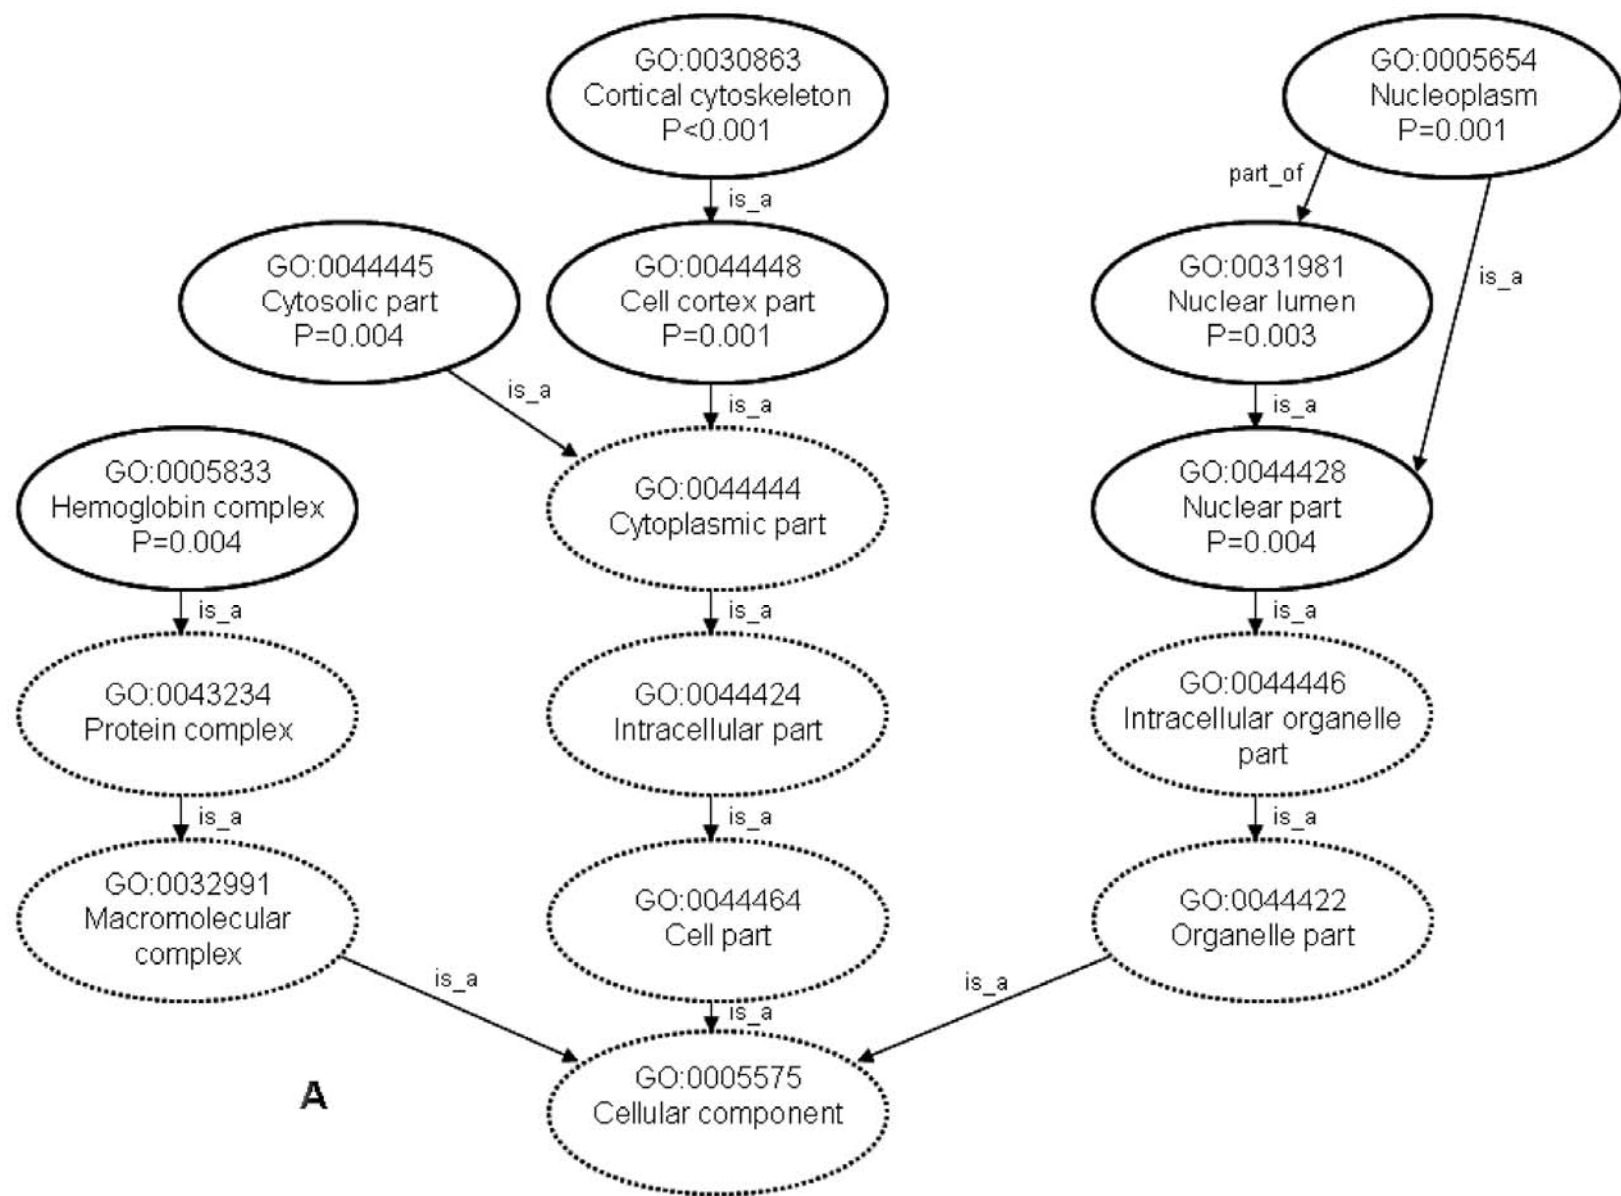



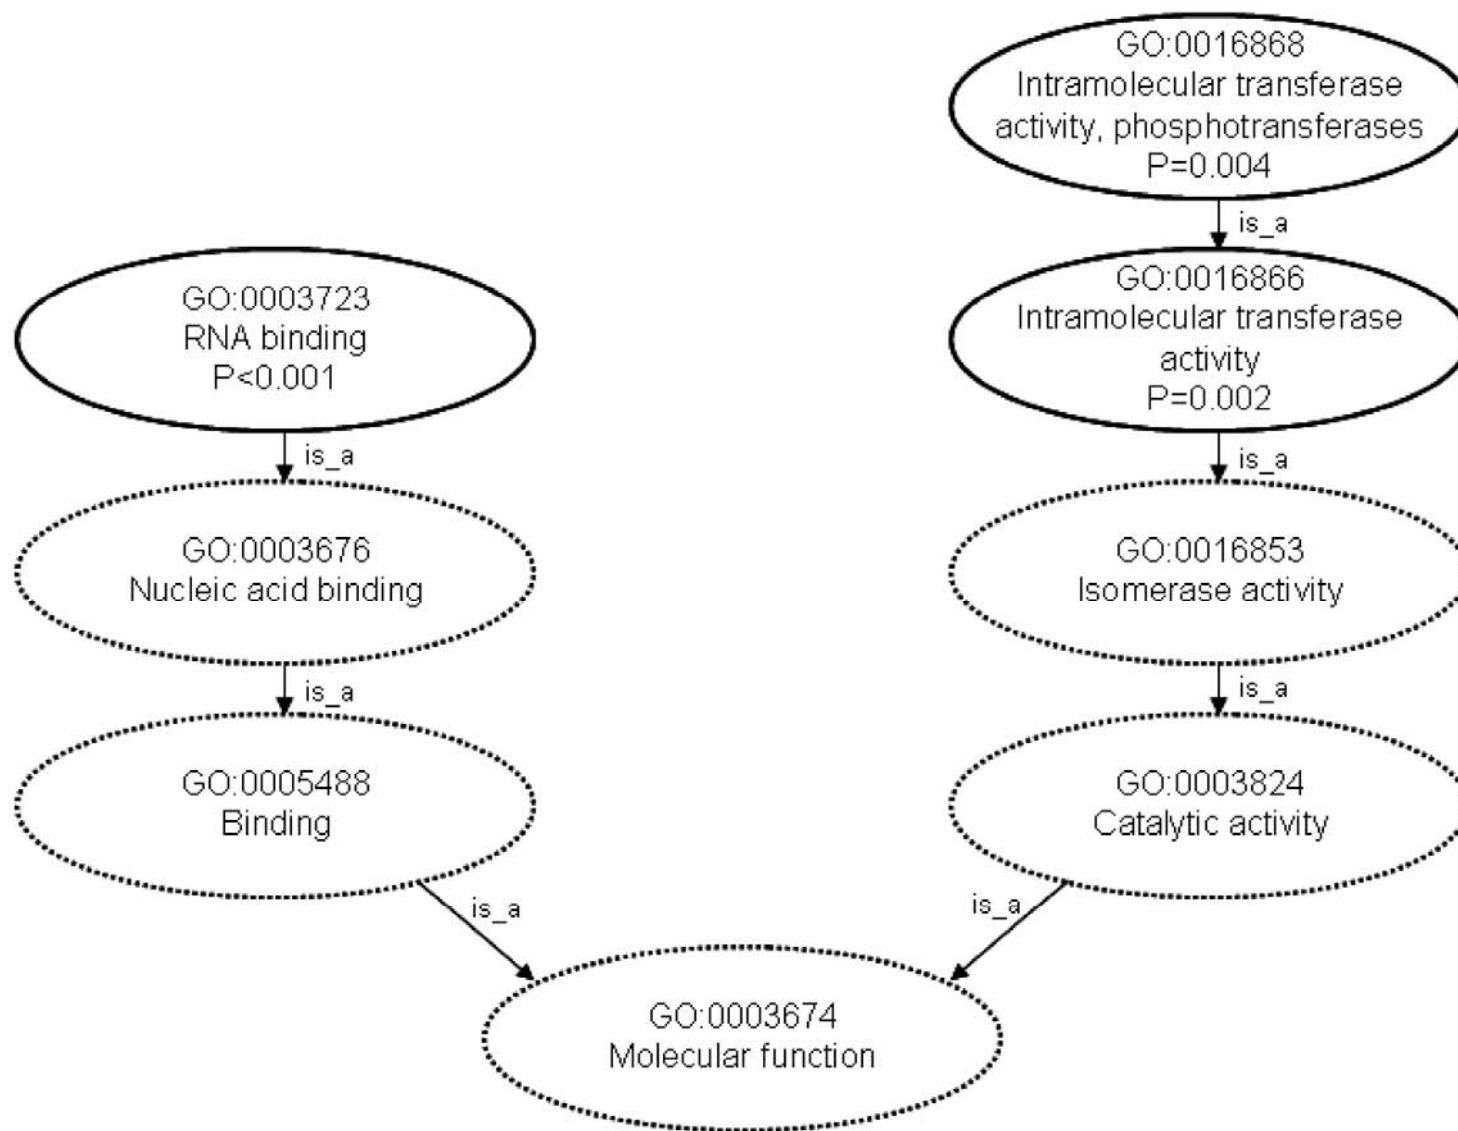

**c**

Supplement: blood_blood-2007-08-107946_6.pdf [file blood_blood-2007-08-107946_6.pdf]
